# Supplementary material for: The Relationship between Immunogenicity and Reactogenicity of Seasonal Influenza Vaccine Using Different Delivery Methods
Source: MDPI journal article supplement (doi:10.3390/vaccines12070809), 2024-07-21
Supplement: s1 [file vaccines-3090941-supplementary.pdf › vaccines-3090941-supplementary.pdf]

## **Table of Contents**

|                                                                                                                         |           |
|-------------------------------------------------------------------------------------------------------------------------|-----------|
| <b>Supplemental Tables .....</b>                                                                                        | <b>2</b>  |
| <i>Table S1. Baseline Participant Characteristics.....</i>                                                              | <i>2</i>  |
| <i>Table S2 (A-C). Longitudinal Associations Between Alternative Cut Point Reaction Score and HAI GMT.....</i>          | <i>3</i>  |
| <i>Table S3 (A-C). Reaction Score and HAI GMT by Study Day.....</i>                                                     | <i>6</i>  |
| <i>Table S4 (A-C). Reaction Score and HAI Titer Fold Change by Study Day .....</i>                                      | <i>9</i>  |
| <i>Table S5. Extreme Reaction Scores and HAI GMT by Study Day.....</i>                                                  | <i>12</i> |
| <i>Table S6. Extreme Reaction Scores and HAI Titer Fold Change by Study Day.....</i>                                    | <i>13</i> |
| <i>Table S7. Reaction Severity and Longitudinal HAI GMT .....</i>                                                       | <i>14</i> |
| <i>Table S8. Reaction Severity and HAI Titer Fold Change by Study Day .....</i>                                         | <i>15</i> |
| <i>Table S9. Reaction Duration and Longitudinal HAI GMT .....</i>                                                       | <i>16</i> |
| <i>Table S10. Reaction Duration and HAI Titer Fold Change by Study Day.....</i>                                         | <i>17</i> |
| <i>Table S11. Longitudinal Associations Between Reaction Score and HAI Seroprotection.....</i>                          | <i>18</i> |
| <i>Table S12. HAI Seroprotection* by Vaccine Route and Day .....</i>                                                    | <i>19</i> |
| <i>Table S13 (A-C). Longitudinal Associations Between Alternative Cut Point Reaction Score and HAI Seroprotection..</i> | <i>20</i> |
| <i>Table S14. Longitudinal Associations Between Reaction Score and HAI Seroconversion .....</i>                         | <i>23</i> |
| <i>Table S15 (A-C). Reaction Score and HAI Seroconversion by Study Day .....</i>                                        | <i>24</i> |
| <i>Table S16 (A-C). Longitudinal Associations Between Alternative Cut Point Reaction Score and HAI Seroconversion .</i> | <i>27</i> |
| <i>Table S17 (A-C). Alternative Cut Point Reaction Score and HAI Seroconversion by Study Day.....</i>                   | <i>30</i> |
| <b>Supplemental Figures .....</b>                                                                                       | <b>36</b> |
| <i>Figure S1. Adverse Events by Vaccine Route.....</i>                                                                  | <i>36</i> |
| <i>Figure S2. Select Local Adverse Events by Time and Vaccine Route .....</i>                                           | <i>37</i> |
| <i>Figure S3. Reaction Score Univariable Distributions.....</i>                                                         | <i>38</i> |
| <i>Figure S4. Reaction Score Bivariable Distributions .....</i>                                                         | <i>39</i> |
| <i>Figure S5. H3N2 HAI Titer by Time and Reaction Score .....</i>                                                       | <i>40</i> |

## Supplemental Tables

**Table S1. Baseline Participant Characteristics.**

| Characteristic*        | IM<br>(n = 25) | MNP<br>(n = 50) | All<br>(n = 75) |
|------------------------|----------------|-----------------|-----------------|
| Age, year              | 28.0 (7.0)     | 26.0 (10.0)     | 27.0 (9.0)      |
| BMI, kg/m <sup>2</sup> | 24.8 (6.9)     | 24.8 (5.3)      | 24.8 (6.0)      |
| ≤ 25                   | 14 (56.0%)     | 26 (52.0%)      | 40 (53.3%)      |
| 25 – < 30              | 9 (36.0%)      | 17 (34.0%)      | 26 (34.7%)      |
| ≥ 30 – ≤ 35            | 2 (8.0%)       | 7 (14.0%)       | 9 (12.0%)       |
| Sex                    |                |                 |                 |
| Female                 | 11 (44.0%)     | 24 (48.0%)      | 35 (46.7%)      |
| Male                   | 14 (56.0%)     | 26 (52.0%)      | 40 (53.3%)      |
| Race                   |                |                 |                 |
| White                  | 12 (48.0%)     | 25 (50.0%)      | 37 (49.3%)      |
| Black                  | 8 (32.0%)      | 16 (32.0%)      | 24 (32.0%)      |
| Other                  | 5 (20.0%)      | 9 (18.0%)       | 14 (18.7%)      |
| Ethnicity              |                |                 |                 |
| Not LatinX             | 22 (88.0%)     | 48 (96.0%)      | 70 (93.3%)      |
| LatinX                 | 3 (12.0%)      | 2 (4.0%)        | 5 (6.7%)        |
| IIV in prior 2 seasons |                |                 |                 |
| No                     | 17 (68.0%)     | 34 (68.0%)      | 51 (68.0%)      |
| Yes                    | 8 (32.0%)      | 16 (32.0%)      | 24 (32.0%)      |
| Baseline HAI titer^    |                |                 |                 |
| H1N1                   | 80.0 (80.0)    | 80.0 (140.0)    | 80.0 (120.0)    |
| H3N2                   | 40.0 (60.0)    | 40.0 (65.0)     | 40.0 (60.0)     |
| B                      | 40.0 (40.0)    | 20.0 (30.0)     | 40.0 (70.0)     |
| Missing                | 0              | 2 (4%)          | 2 (2.7%)        |

BMI: body mass index; IIV: inactivated influenza vaccine; HAI: hemagglutination inhibition

\*continuous variables: median (IQR); categorical variables: N (%)

^represented as inverse titers

**Table S2A. Longitudinal Associations Between Alternative Cut Point Global Reaction Score and HAI GMT.**

| Reaction Type                      | Antigen | Study Group | Unadjusted GMR*<br>(95% CI)        | p-value     | Adjusted GMR*^<br>(95% CI) | p-value |
|------------------------------------|---------|-------------|------------------------------------|-------------|----------------------------|---------|
| Global<br>( $\geq 3$ vs $\leq 2$ ) | H1N1    | IM          | 0.96<br>(0.51, 1.81)               | 0.90        | 0.93<br>(0.58, 1.51)       | 0.77    |
|                                    |         | MNP         | 0.94<br>(0.56, 1.58)               | 0.81        | 0.91<br>(0.64, 1.29)       | 0.59    |
|                                    | H3N2    | IM          | 0.97<br>(0.57, 1.64)               | 0.90        | 0.84<br>(0.53, 1.33)       | 0.45    |
|                                    |         | MNP         | 0.81<br>(0.53, 1.26)               | 0.35        | 0.78<br>(0.56, 1.10)       | 0.15    |
|                                    | B       | IM          | <b>1.47</b><br><b>(1.02, 2.12)</b> | <b>0.04</b> | 1.16<br>(0.80, 1.69)       | 0.42    |
|                                    |         | MNP         | 1.04<br>(0.71, 1.53)               | 0.82        | 1.05<br>(0.76, 1.44)       | 0.77    |
| Global<br>( $\geq 5$ vs $\leq 4$ ) | H1N1    | IM          | 0.85<br>(0.39, 1.87)               | 0.68        | 0.81<br>(0.45, 1.45)       | 0.47    |
|                                    |         | MNP         | 1.03<br>(0.57, 1.86)               | 0.91        | 0.95<br>(0.64, 1.43)       | 0.82    |
|                                    | H3N2    | IM          | 0.82<br>(0.43, 1.58)               | 0.55        | 0.73<br>(0.42, 1.26)       | 0.25    |
|                                    |         | MNP         | 1.00<br>(0.61, 1.64)               | 1.0         | 0.94<br>(0.64, 1.39)       | 0.76    |
|                                    | B       | IM          | 0.91<br>(0.57, 1.45)               | 0.69        | 0.69<br>(0.44, 1.08)       | 0.10    |
|                                    |         | MNP         | 0.91<br>(0.59, 1.42)               | 0.68        | 0.90<br>(0.63, 1.28)       | 0.54    |

HAI: hemagglutination inhibition; GMT: geometric mean titer; GMR: geometric mean titer ratio; CI: confidence interval; IM: intramuscular; MNP: microneedle patch;

\*Estimated geometric mean titer ratio for those in the higher score category compared with those in the lower score category

^Adjusted for body mass index category, sex, prior inactivated influenza vaccination, race, ethnicity, and study day

**Table S2B. Longitudinal Associations Between Alternative Cut Point Systemic Reaction Score and HAI GMT.**

| Reaction Type                        | Antigen | Study Group | Unadjusted GMR*<br>(95% CI)        | p-value     | Adjusted GMR*^<br>(95% CI) | p-value |
|--------------------------------------|---------|-------------|------------------------------------|-------------|----------------------------|---------|
| Systemic<br>( $\geq 1$ vs 0)         | H1N1    | IM          | 1.15<br>(0.60, 2.18)               | 0.67        | 1.12<br>(0.70, 1.81)       | 0.63    |
|                                      |         | MNP         | 0.81<br>(0.49, 1.35)               | 0.42        | 0.8<br>(0.57, 1.13)        | 0.21    |
|                                      | H3N2    | IM          | 0.95<br>(0.56, 1.63)               | 0.86        | 0.84<br>(0.53, 1.32)       | 0.44    |
|                                      |         | MNP         | 1.02<br>(0.66, 1.56)               | 0.94        | 1.03<br>(0.74, 1.44)       | 0.87    |
|                                      | B       | IM          | <b>1.54</b><br><b>(1.07, 2.22)</b> | <b>0.02</b> | 1.22<br>(0.84, 1.76)       | 0.29    |
|                                      |         | MNP         | 0.87<br>(0.60, 1.28)               | 0.48        | 0.89<br>(0.66, 1.21)       | 0.47    |
| Systemic<br>( $\geq 2$ vs $\leq 1$ ) | H1N1    | IM          | 1.03<br>(0.55, 1.93)               | 0.94        | 1.0<br>(0.63, 1.59)        | 0.99    |
|                                      |         | MNP         | 1.04<br>(0.59, 1.84)               | 0.89        | 1.12<br>(0.76, 1.65)       | 0.56    |
|                                      | H3N2    | IM          | 0.79<br>(0.47, 1.33)               | 0.37        | 0.72<br>(0.46, 1.11)       | 0.13    |
|                                      |         | MNP         | 0.99<br>(0.61, 1.60)               | 0.95        | 0.99<br>(0.68, 1.44)       | 0.94    |
|                                      | B       | IM          | 1.42<br>(0.99, 2.05)               | 0.06        | 1.17<br>(0.82, 1.67)       | 0.39    |
|                                      |         | MNP         | 0.86<br>(0.56, 1.33)               | 0.50        | 0.87<br>(0.62, 1.23)       | 0.43    |

HAI: hemagglutination inhibition; GMT: geometric mean titer; GMR: geometric mean titer ratio; CI: confidence interval; IM: intramuscular; MNP: microneedle patch;

\*Estimated geometric mean titer ratio for those in the higher score category compared with those in the lower score category

^Adjusted for body mass index category, sex, prior inactivated influenza vaccination, race, ethnicity, and study day

**Table S2C. Longitudinal Associations Between Alternative Cut Point Local Reaction Score and HAI GMT.**

| Reaction Type                     | Antigen | Study Group | Unadjusted GMR*<br>(95% CI) | p-value | Adjusted GMR*^<br>(95% CI) | p-value |
|-----------------------------------|---------|-------------|-----------------------------|---------|----------------------------|---------|
| Local<br>( $\geq 1$ vs 0)         | H1N1    | IM          | 1.40<br>(0.71, 2.73)        | 0.32    | 1.34<br>(0.81, 2.21)       | 0.25    |
|                                   |         | MNP         | 1.18<br>(0.51, 2.71)        | 0.69    | 1.00<br>(0.57, 1.77)       | 1.0     |
|                                   | H3N2    | IM          | 1.01<br>(0.58, 1.77)        | 0.97    | 0.92<br>(0.57, 1.49)       | 0.73    |
|                                   |         | MNP         | 1.00<br>(0.49, 2.01)        | 0.99    | 0.94<br>(0.54, 1.63)       | 0.81    |
|                                   | B       | IM          | 1.18<br>(0.80, 1.76)        | 0.40    | 0.95<br>(0.64, 1.40)       | 0.79    |
|                                   |         | MNP         | 1.19<br>(0.64, 2.21)        | 0.59    | 1.13<br>(0.68, 1.87)       | 0.64    |
| Local<br>( $\geq 2$ vs $\leq 1$ ) | H1N1    | IM          | 1.10<br>(0.58, 2.09)        | 0.78    | 1.02<br>(0.63, 1.66)       | 0.92    |
|                                   |         | MNP         | 1.19<br>(0.69, 2.05)        | 0.53    | 1.05<br>(0.72, 1.55)       | 0.79    |
|                                   | H3N2    | IM          | 1.22<br>(0.72, 2.08)        | 0.46    | 1.05<br>(0.66, 1.67)       | 0.83    |
|                                   |         | MNP         | 0.79<br>(0.50, 1.26)        | 0.32    | 0.73<br>(0.50, 1.05)       | 0.09    |
|                                   | B       | IM          | 1.20<br>(0.83, 1.75)        | 0.33    | 0.92<br>(0.63, 1.34)       | 0.66    |
|                                   |         | MNP         | 1.30<br>(0.87, 1.96)        | 0.20    | 1.25<br>(0.89, 1.76)       | 0.19    |

HAI: hemagglutination inhibition; GMT: geometric mean titer; GMR: geometric mean titer ratio; CI: confidence interval; IM: intramuscular; MNP: microneedle patch;

\*Estimated geometric mean titer ratio for those in the higher score category compared with those in the lower score category

^Adjusted for body mass index category, sex, prior inactivated influenza vaccination, race, ethnicity, and study day

**Table S3A. Reaction Score and H1N1 HAI GMT by Study Day.**

| Reaction Type         | Study Group | Day 0<br>GMR*<br>(95% CI) | p-value | Day 28<br>GMR*<br>(95% CI) | p-value | Day 180<br>GMR*<br>(95% CI) | p-value |
|-----------------------|-------------|---------------------------|---------|----------------------------|---------|-----------------------------|---------|
| Unadjusted            |             |                           |         |                            |         |                             |         |
| Global                | IM          | 1.0<br>(0.4, 2.4)         | 0.99    | 1.1<br>(0.5, 2.5)          | 0.87    | 1.1<br>(0.5, 2.7)           | 0.77    |
|                       | MNP         | 1.2<br>(0.6, 2.3)         | 0.59    | 0.7<br>(0.4, 1.4)          | 0.36    | 0.7<br>(0.4, 1.4)           | 0.35    |
| Systemic              | IM          | 0.6<br>(0.2, 1.4)         | 0.21    | 0.9<br>(0.4, 2.1)          | 0.78    | 0.8<br>(0.3, 1.9)           | 0.58    |
|                       | MNP         | 1.5<br>(0.5, 4.2)         | 0.48    | 0.7<br>(0.2, 2.0)          | 0.50    | 0.7<br>(0.3, 2.1)           | 0.56    |
| Local                 | IM          | 1.0<br>(0.3, 3.3)         | 0.94    | 0.5<br>(0.1, 1.5)          | 0.19    | 0.4<br>(0.1, 1.3)           | 0.14    |
|                       | MNP         | 1.6<br>(0.9, 2.9)         | 0.14    | 1.5<br>(0.8, 2.8)          | 0.18    | 1.5<br>(0.8, 2.8)           | 0.18    |
| Adjusted <sup>^</sup> |             |                           |         |                            |         |                             |         |
| Global                | IM          | 0.9<br>(0.4, 2.2)         | 0.86    | 1.0<br>(0.4, 2.3)          | 0.98    | 1.0<br>(0.4, 2.4)           | 0.92    |
|                       | MNP         | 1.2<br>(0.6, 2.2)         | 0.64    | 0.7<br>(0.4, 1.4)          | 0.32    | 0.7<br>(0.4, 1.4)           | 0.31    |
| Systemic              | IM          | 0.5<br>(0.2, 1.2)         | 0.13    | 0.8<br>(0.3, 1.9)          | 0.59    | 0.7<br>(0.3, 1.7)           | 0.41    |
|                       | MNP         | 1.4<br>(0.5, 3.9)         | 0.55    | 0.7<br>(0.2, 1.9)          | 0.42    | 0.7<br>(0.2, 2.0)           | 0.48    |
| Local                 | IM          | 1.1<br>(0.3, 3.3)         | 0.91    | 0.5<br>(0.2, 1.5)          | 0.20    | 0.4<br>(0.1, 1.3)           | 0.14    |
|                       | MNP         | 1.6<br>(0.9, 2.9)         | 0.14    | 1.5<br>(0.8, 2.8)          | 0.19    | 1.5<br>(0.8, 2.8)           | 0.19    |

HAI: hemagglutination inhibition; GMT: geometric mean titer; GMR: geometric mean titer ratio; CI: confidence interval;  
IM: intramuscular; MNP: microneedle patch;

\*Estimated geometric mean titer ratio for those in the higher score category compared with those in the lower score category

<sup>^</sup>Adjusted for body mass index category, sex, prior inactivated influenza vaccination, race, ethnicity, and study day

**Table S3B. Reaction Score and H3N2 HAI GMT by Study Day.**

| Reaction Type         | Study Group | Day 0<br>GMR*<br>(95% CI)       | p-value     | Day 28<br>GMR*<br>(95% CI) | p-value | Day 180<br>GMR*<br>(95% CI) | p-value |
|-----------------------|-------------|---------------------------------|-------------|----------------------------|---------|-----------------------------|---------|
| Unadjusted            |             |                                 |             |                            |         |                             |         |
| Global                | IM          | 0.5<br>(0.2, 1.1)               | 0.09        | 1.1<br>(0.5, 2.4)          | 0.82    | 1.0<br>(0.5, 2.2)           | 0.93    |
|                       | MNP         | 0.8<br>(0.4, 1.5)               | 0.53        | 0.7<br>(0.4, 1.4)          | 0.32    | 0.9<br>(0.5, 1.6)           | 0.69    |
| Systemic              | IM          | <b>0.4</b><br><b>(0.2, 0.9)</b> | <b>0.03</b> | 1.0<br>(0.5, 2.3)          | 0.96    | 0.6<br>(0.3, 1.4)           | 0.25    |
|                       | MNP         | 1.3<br>(0.5, 3.6)               | 0.63        | 1.5<br>(0.5, 4.1)          | 0.47    | 1.6<br>(0.6, 4.4)           | 0.40    |
| Local                 | IM          | <b>0.3</b><br><b>(0.1, 0.9)</b> | <b>0.03</b> | 0.7<br>(0.2, 1.9)          | 0.48    | 0.5<br>(0.2, 1.3)           | 0.13    |
|                       | MNP         | 0.6<br>(0.4, 1.2)               | 0.16        | 0.7<br>(0.4, 1.3)          | 0.29    | 0.8<br>(0.4, 1.4)           | 0.43    |
| Adjusted <sup>^</sup> |             |                                 |             |                            |         |                             |         |
| Global                | IM          | 0.5<br>(0.2, 1.0)               | 0.06        | 1.0<br>(0.4, 2.2)          | 0.95    | 0.9<br>(0.4, 2.1)           | 0.85    |
|                       | MNP         | 0.8<br>(0.4, 1.5)               | 0.45        | 0.7<br>(0.4, 1.3)          | 0.26    | 0.8<br>(0.5, 1.6)           | 0.60    |
| Systemic              | IM          | <b>0.4</b><br><b>(0.2, 0.8)</b> | <b>0.01</b> | 0.9<br>(0.4, 1.9)          | 0.7     | 0.5<br>(0.2, 1.2)           | 0.12    |
|                       | MNP         | 1.3<br>(0.5, 3.5)               | 0.63        | 1.4<br>(0.5, 4.0)          | 0.47    | 1.5<br>(0.6, 4.3)           | 0.40    |
| Local                 | IM          | <b>0.3</b><br><b>(0.1, 0.8)</b> | <b>0.01</b> | 0.6<br>(0.2, 1.6)          | 0.28    | 0.4<br>(0.1, 1.1)           | 0.07    |
|                       | MNP         | 0.6<br>(0.3, 1.0)               | 0.06        | 0.6<br>(0.4, 1.1)          | 0.13    | 0.7<br>(0.4, 1.2)           | 0.22    |

HAI: hemagglutination inhibition; GMT: geometric mean titer; GMR: geometric mean titer ratio; CI: confidence interval;  
IM: intramuscular; MNP: microneedle patch;

\*Estimated geometric mean titer ratio for those in the higher score category compared with those in the lower score category

<sup>^</sup>Adjusted for body mass index category, sex, prior inactivated influenza vaccination, race, ethnicity, and study day

**Table S3C. Reaction Score and B HAI GMT by Study Day.**

| Reaction Type         | Study Group | Day 0<br>GMR*<br>(95% CI)       | p-value     | Day 28<br>GMR*<br>(95% CI) | p-value | Day 180<br>GMR*<br>(95% CI) | p-value |
|-----------------------|-------------|---------------------------------|-------------|----------------------------|---------|-----------------------------|---------|
| Unadjusted            |             |                                 |             |                            |         |                             |         |
| Global                | IM          | 1.2<br>(0.6, 2.3)               | 0.54        | 1.2<br>(0.6, 2.3)          | 0.58    | 1.2<br>(0.6, 2.3)           | 0.55    |
|                       | MNP         | 0.6<br>(0.3, 1.0)               | 0.05        | 1.1<br>(0.6, 1.9)          | 0.84    | 0.9<br>(0.5, 1.6)           | 0.66    |
| Systemic              | IM          | 0.9<br>(0.5, 1.8)               | 0.83        | 1.1<br>(0.6, 2.1)          | 0.80    | 1.2<br>(0.6, 2.4)           | 0.60    |
|                       | MNP         | 1.0<br>(0.4, 2.5)               | 0.92        | 0.9<br>(0.4, 2.5)          | 0.90    | 0.7<br>(0.2, 1.7)           | 0.39    |
| Local                 | IM          | 1.2<br>(0.5, 3.0)               | 0.66        | 0.8<br>(0.3, 2.0)          | 0.68    | 1.2<br>(0.5, 2.9)           | 0.73    |
|                       | MNP         | 0.7<br>(0.4, 1.3)               | 0.26        | 1.1<br>(0.6, 2.0)          | 0.71    | 1.1<br>(0.6, 2.0)           | 0.65    |
| Adjusted <sup>^</sup> |             |                                 |             |                            |         |                             |         |
| Global                | IM          | 1.0<br>(0.5, 1.8)               | 0.89        | 0.9<br>(0.5, 1.8)          | 0.85    | 0.9<br>(0.5, 1.8)           | 0.87    |
|                       | MNP         | <b>0.6</b><br><b>(0.3, 1.0)</b> | <b>0.04</b> | 1.1<br>(0.6, 1.9)          | 0.80    | 0.9<br>(0.5, 1.5)           | 0.67    |
| Systemic              | IM          | 0.7<br>(0.4, 1.4)               | 0.32        | 0.8<br>(0.4, 1.6)          | 0.59    | 0.9<br>(0.5, 1.8)           | 0.80    |
|                       | MNP         | 0.9<br>(0.4, 2.2)               | 0.81        | 0.9<br>(0.3, 2.2)          | 0.78    | 0.6<br>(0.2, 1.5)           | 0.29    |
| Local                 | IM          | 1.0<br>(0.4, 2.5)               | 0.95        | 0.7<br>(0.3, 1.7)          | 0.42    | 1.0<br>(0.4, 2.4)           | 0.98    |
|                       | MNP         | 0.7<br>(0.4, 1.3)               | 0.29        | 1.1<br>(0.7, 2.0)          | 0.62    | 1.2<br>(0.7, 2.0)           | 0.57    |

HAI: hemagglutination inhibition; GMT: geometric mean titer; GMR: geometric mean titer ratio; CI: confidence interval;  
IM: intramuscular; MNP: microneedle patch;

\*Estimated geometric mean titer ratio for those in the higher score category compared with those in the lower score category

<sup>^</sup>Adjusted for body mass index category, sex, prior inactivated influenza vaccination, race, ethnicity, and study day



**Table S4A. Reaction Score and H1N1 HAI Titer Fold Change by Study Day.**

| Reaction Type         | Study Group | Day 28<br>FCR*<br>(95% CI) | p-value | Day 180<br>FCR*<br>(95% CI) | p-value |
|-----------------------|-------------|----------------------------|---------|-----------------------------|---------|
| Unadjusted            |             |                            |         |                             |         |
| Global                | IM          | 1.1<br>(0.3, 3.7)          | 0.92    | 1.1<br>(0.3, 3.9)           | 0.85    |
|                       | MNP         | 0.6<br>(0.3, 1.4)          | 0.26    | 0.6<br>(0.3, 1.4)           | 0.25    |
| Systemic              | IM          | 1.5<br>(0.4, 5.6)          | 0.51    | 1.4<br>(0.4, 5.0)           | 0.63    |
|                       | MNP         | 0.5<br>(0.1, 1.8)          | 0.28    | 0.5<br>(0.1, 1.9)           | 0.31    |
| Local                 | IM          | 0.4<br>(0.1, 2.4)          | 0.34    | 0.4<br>(0.1, 2.2)           | 0.28    |
|                       | MNP         | 1.0<br>(0.4, 2.1)          | 0.91    | 1.0<br>(0.4, 2.1)           | 0.91    |
| Adjusted <sup>^</sup> |             |                            |         |                             |         |
| Global                | IM          | 1.0<br>(0.3, 3.1)          | 0.94    | 1.0<br>(0.3, 3.3)           | 0.99    |
|                       | MNP         | 0.7<br>(0.3, 1.4)          | 0.30    | 0.7<br>(0.3, 1.4)           | 0.29    |
| Systemic              | IM          | 1.1<br>(0.3, 4.0)          | 0.84    | 1.0<br>(0.3, 3.5)           | 1.0     |
|                       | MNP         | 0.6<br>(0.2, 2.0)          | 0.41    | 0.6<br>(0.2, 2.1)           | 0.45    |
| Local                 | IM          | 0.4<br>(0.1, 2.2)          | 0.32    | 0.4<br>(0.1, 2.0)           | 0.27    |
|                       | MNP         | 1.0<br>(0.5, 2.2)          | 0.90    | 1.0<br>(0.5, 2.2)           | 0.90    |

HAI: hemagglutination inhibition; FCR: fold change ratio; CI: confidence interval; IM: intramuscular; MNP: microneedle patch;

\*Estimated fold change ratio for those in the higher score category compared with those in the lower score category

<sup>^</sup>Adjusted for body mass index category, sex, prior inactivated influenza vaccination, race, ethnicity, and study day

**Table S4B. Reaction Score and H3N2 HAI Titer Fold Change by Study Day.**

| Reaction Type | Study Group | Day 28<br>FCR*<br>(95% CI)      | p-value     | Day 180<br>FCR*<br>(95% CI)   | p-value     |
|---------------|-------------|---------------------------------|-------------|-------------------------------|-------------|
| Unadjusted    |             |                                 |             |                               |             |
| Global        | IM          | <b>2.1</b><br><b>(1.1, 4.1)</b> | <b>0.03</b> | <b>2</b><br><b>(1.0, 3.9)</b> | <b>0.04</b> |
|               | MNP         | 0.9<br>(0.5, 1.6)               | 0.68        | 1.1<br>(0.6, 1.9)             | 0.81        |
| Systemic      | IM          | <b>2.4</b><br><b>(1.2, 5.0)</b> | <b>0.02</b> | 1.5<br>(0.7, 3.1)             | 0.27        |
|               | MNP         | 1.1<br>(0.4, 2.9)               | 0.79        | 1.2<br>(0.5, 3.1)             | 0.69        |
| Local         | IM          | 2.2<br>(0.8, 5.7)               | 0.12        | 1.4<br>(0.5, 3.8)             | 0.48        |
|               | MNP         | 1.1<br>(0.6, 1.9)               | 0.69        | 1.2<br>(0.7, 2.1)             | 0.48        |
| Adjusted^     |             |                                 |             |                               |             |
| Global        | IM          | <b>2.0</b><br><b>(1.0, 3.7)</b> | <b>0.04</b> | 1.9<br>(1.0, 3.5)             | 0.05        |
|               | MNP         | 0.9<br>(0.6, 1.6)               | 0.83        | 1.1<br>(0.7, 1.9)             | 0.61        |
| Systemic      | IM          | 1.9<br>(1.0, 3.8)               | 0.07        | 1.2<br>(0.6, 2.4)             | 0.64        |
|               | MNP         | 1.3<br>(0.6, 3.1)               | 0.49        | 1.4<br>(0.6, 3.3)             | 0.40        |
| Local         | IM          | 2<br>(0.8, 4.9)                 | 0.15        | 1.3<br>(0.5, 3.2)             | 0.58        |
|               | MNP         | 1.1<br>(0.7, 1.9)               | 0.66        | 1.2<br>(0.7, 2.0)             | 0.44        |

HAI: hemagglutination inhibition; FCR: fold change ratio; CI: confidence interval; IM: intramuscular; MNP: microneedle patch;

\*Estimated fold change ratio for those in the higher score category compared with those in the lower score category

^Adjusted for body mass index category, sex, prior inactivated influenza vaccination, race, ethnicity, and study day

**Table S4C. Reaction Score and B HAI Titer Fold Change by Study Day.**

| Reaction Type | Study Group | Day 28<br>FCR*<br>(95% CI)      | p-value     | Day 180<br>FCR*<br>(95% CI) | p-value |
|---------------|-------------|---------------------------------|-------------|-----------------------------|---------|
| Unadjusted    |             |                                 |             |                             |         |
| Global        | IM          | 1.0<br>(0.4, 2.3)               | 0.97        | 1.0<br>(0.4, 2.4)           | 0.99    |
|               | MNP         | 1.9<br>(1.0, 3.6)               | 0.05        | 1.6<br>(0.8, 3.0)           | 0.16    |
| Systemic      | IM          | 1.2<br>(0.5, 2.9)               | 0.73        | 1.3<br>(0.5, 3.2)           | 0.58    |
|               | MNP         | 1.0<br>(0.3, 2.9)               | 0.98        | 0.7<br>(0.2, 2.0)           | 0.49    |
| Local         | IM          | 0.7<br>(0.2, 2.2)               | 0.52        | 1.0<br>(0.3, 3.1)           | 0.94    |
|               | MNP         | 1.5<br>(0.8, 2.9)               | 0.17        | 1.6<br>(0.8, 2.9)           | 0.15    |
| Adjusted^     |             |                                 |             |                             |         |
| Global        | IM          | 0.8<br>(0.4, 1.6)               | 0.46        | 0.8<br>(0.4, 1.6)           | 0.48    |
|               | MNP         | <b>1.8</b><br><b>(1.1, 3.2)</b> | <b>0.03</b> | 1.5<br>(0.9, 2.6)           | 0.14    |
| Systemic      | IM          | 0.9<br>(0.4, 1.9)               | 0.70        | 0.9<br>(0.4, 2.1)           | 0.88    |
|               | MNP         | 1.1<br>(0.4, 2.9)               | 0.79        | 0.8<br>(0.3, 2.0)           | 0.61    |
| Local         | IM          | 0.5<br>(0.2, 1.5)               | 0.22        | 0.7<br>(0.3, 2.1)           | 0.58    |
|               | MNP         | 1.3<br>(0.7, 2.2)               | 0.39        | 1.3<br>(0.7, 2.3)           | 0.35    |

HAI: hemagglutination inhibition; FCR: fold change ratio; CI: confidence interval; IM: intramuscular; MNP: microneedle patch;

\*Estimated fold change ratio for those in the higher score category compared with those in the lower score category

^Adjusted for body mass index category, sex, prior inactivated influenza vaccination, race, ethnicity, and study day

**Table S5. Extreme Reaction Scores and HAI GMT by Study Day.**

| Reaction Type | Antigen | Study Group | Day 0 GMR* (95% CI)              | p-value     | Day 28 GMR* (95% CI) | p-value | Day 180 GMR* (95% CI)           | p-value     |
|---------------|---------|-------------|----------------------------------|-------------|----------------------|---------|---------------------------------|-------------|
| Global        | H1N1    | IM          | 0.9<br>(0.3, 2.8)                | 0.87        | 0.8<br>(0.3, 2.5)    | 0.74    | 0.9<br>(0.3, 2.8)               | 0.87        |
|               |         | MNP         | 1.7<br>(0.5, 5.3)                | 0.35        | 1.6<br>(0.5, 4.8)    | 0.44    | 1.4<br>(0.4, 4.2)               | 0.60        |
|               | H3N2    | IM          | 0.6<br>(0.2, 1.6)                | 0.28        | 1.2<br>(0.4, 3.4)    | 0.73    | 1.1<br>(0.4, 3.2)               | 0.84        |
|               |         | MNP         | 0.5<br>(0.2, 1.5)                | 0.24        | 0.7<br>(0.3, 1.9)    | 0.47    | 0.9<br>(0.3, 2.4)               | 0.75        |
|               | B       | IM          | 0.9<br>(0.4, 1.8)                | 0.68        | 1.2<br>(0.5, 2.5)    | 0.68    | 1.5<br>(0.7, 3.2)               | 0.29        |
|               |         | MNP         | 0.8<br>(0.4, 1.8)                | 0.60        | 1.0<br>(0.5, 2.3)    | 0.95    | 1.1<br>(0.5, 2.4)               | 0.86        |
| Systemic      | H1N1    | IM          | 0.5<br>(0.2, 1.7)                | 0.30        | 0.7<br>(0.2, 2.3)    | 0.55    | 0.5<br>(0.2, 1.6)               | 0.24        |
|               |         | MNP         | 1.5<br>(0.5, 4.5)                | 0.44        | 0.8<br>(0.3, 2.3)    | 0.63    | 0.6<br>(0.2, 1.8)               | 0.35        |
|               | H3N2    | IM          | 0.4<br>(0.1, 1.3)                | 0.14        | 1.2<br>(0.4, 3.8)    | 0.76    | 0.8<br>(0.2, 2.4)               | 0.65        |
|               |         | MNP         | 0.5<br>(0.2, 1.1)                | 0.08        | 0.6<br>(0.3, 1.4)    | 0.23    | 0.7<br>(0.3, 1.5)               | 0.38        |
|               | B       | IM          | 1.0<br>(0.4, 2.6)                | 1.0         | 1.5<br>(0.6, 4.0)    | 0.36    | 1.5<br>(0.6, 4.0)               | 0.36        |
|               |         | MNP         | 1.2<br>(0.6, 2.4)                | 0.69        | 0.7<br>(0.4, 1.5)    | 0.41    | 0.6<br>(0.3, 1.3)               | 0.20        |
| Local         | H1N1    | IM          | <b>4.4</b><br><b>(1.1, 17.7)</b> | <b>0.04</b> | 0.3<br>(0.1, 1.1)    | 0.07    | 0.6<br>(0.2, 2.6)               | 0.54        |
|               |         | MNP         | 1.2<br>(0.5, 2.9)                | 0.61        | 1.2<br>(0.5, 2.7)    | 0.73    | 1.4<br>(0.6, 3.1)               | 0.47        |
|               | H3N2    | IM          | <b>0.2</b><br><b>(0.1, 0.8)</b>  | <b>0.02</b> | 0.3<br>(0.1, 1.1)    | 0.06    | <b>0.2</b><br><b>(0.1, 0.8)</b> | <b>0.02</b> |
|               |         | MNP         | 0.5<br>(0.2, 1.4)                | 0.17        | 0.6<br>(0.2, 1.8)    | 0.40    | 0.7<br>(0.2, 1.8)               | 0.42        |
|               | B       | IM          | 2.0<br>(0.9, 4.3)                | 0.08        | 0.9<br>(0.4, 2.0)    | 0.82    | 1.4<br>(0.7, 3.1)               | 0.37        |
|               |         | MNP         | 0.8<br>(0.4, 1.9)                | 0.63        | 0.9<br>(0.4, 2.1)    | 0.87    | 1.3<br>(0.5, 2.9)               | 0.58        |

HAI: hemagglutination inhibition; GMT: geometric mean titer; GMR: geometric mean titer ratio; CI: confidence interval; IM: intramuscular; MNP: microneedle patch;

\*Estimated geometric mean titer ratio for those in the higher score category compared with those in the lower score category

**Table S6. Extreme Reaction Scores and HAI Titer Fold Change by Study Day.**

| Reaction Type | Antigen | Study Group | Day 0 FCR* (95% CI)             | p-value     | Day 28 FCR * (95% CI) | p-value |
|---------------|---------|-------------|---------------------------------|-------------|-----------------------|---------|
| Global        | H1N1    | IM          | 0.9<br>(0.2, 5.3)               | 0.92        | 1.0<br>(0.2, 5.9)     | 1.0     |
|               |         | MNP         | 0.9<br>(0.3, 2.8)               | 0.87        | 0.8<br>(0.3, 2.5)     | 0.68    |
|               | H3N2    | IM          | 2.1<br>(1.0, 4.7)               | 0.06        | 2<br>(0.9, 4.4)       | 0.09    |
|               |         | MNP         | 1.3<br>(0.5, 3.1)               | 0.61        | 1.6<br>(0.6, 3.8)     | 0.33    |
|               | B       | IM          | 1.4<br>(0.8, 2.4)               | 0.29        | 1.7<br>(1.0, 3.1)     | 0.06    |
|               |         | MNP         | 1.3<br>(0.5, 3.0)               | 0.59        | 1.3<br>(0.5, 3.2)     | 0.52    |
| Systemic      | H1N1    | IM          | 1.3<br>(0.2, 8.4)               | 0.78        | 0.9<br>(0.1, 6.0)     | 0.92    |
|               |         | MNP         | 0.5<br>(0.2, 1.4)               | 0.18        | 0.4<br>(0.1, 1.1)     | 0.07    |
|               | H3N2    | IM          | <b>2.8</b><br><b>(1.2, 6.5)</b> | <b>0.02</b> | 1.8<br>(0.8, 4.2)     | 0.15    |
|               |         | MNP         | 1.3<br>(0.6, 2.6)               | 0.54        | 1.4<br>(0.7, 3.0)     | 0.34    |
|               | B       | IM          | 1.5<br>(0.7, 3.3)               | 0.25        | 1.5<br>(0.7, 3.3)     | 0.25    |
|               |         | MNP         | 0.6<br>(0.3, 1.5)               | 0.31        | 0.5<br>(0.2, 1.3)     | 0.17    |
| Local         | H1N1    | IM          | <b>0.1</b><br><b>(0.0, 0.5)</b> | <b>0.01</b> | 0.1<br>(0.0, 1.2)     | 0.07    |
|               |         | MNP         | 0.9<br>(0.3, 3.1)               | 0.91        | 1.1<br>(0.3, 3.7)     | 0.88    |
|               | H3N2    | IM          | 1.4<br>(0.5, 4.2)               | 0.52        | 1.1<br>(0.4, 3.2)     | 0.87    |
|               |         | MNP         | 1.3<br>(0.6, 3.2)               | 0.52        | 1.4<br>(0.6, 3.3)     | 0.48    |
|               | B       | IM          | 0.5<br>(0.2, 1.2)               | 0.11        | 0.7<br>(0.3, 1.9)     | 0.47    |
|               |         | MNP         | 1.1<br>(0.4, 3.0)               | 0.79        | 1.5<br>(0.6, 4.1)     | 0.38    |

HAI: hemagglutination inhibition; FCR: fold change ratio; CI: confidence interval; IM: intramuscular; MNP: microneedle patch;

\*Estimated fold change ratio for those in the higher score category compared with those in the lower score category

**Table S7. Reaction Severity and Longitudinal HAI GMT.**

| Reaction               | Antigen | Study Group | Unadjusted GMR*<br>(95% CI) | p-value | Adjusted GMR*^<br>(95% CI) | p-value |
|------------------------|---------|-------------|-----------------------------|---------|----------------------------|---------|
| Severe<br>(Yes vs. No) | H1N1    | IM          | 1.1<br>(0.6, 2.2)           | 0.69    | 1.1<br>(0.6, 2.2)          | 0.75    |
|                        |         | MNP         | 1.3<br>(0.7, 2.3)           | 0.42    | 1.4<br>(0.8, 2.5)          | 0.30    |
|                        | H3N2    | IM          | 0.9<br>(0.5, 1.6)           | 0.80    | 0.8<br>(0.5, 1.5)          | 0.52    |
|                        |         | MNP         | 0.8<br>(0.5, 1.3)           | 0.41    | 0.8<br>(0.5, 1.3)          | 0.38    |
|                        | B       | IM          | 1.4<br>(0.9, 2.0)           | 0.11    | 1.1<br>(0.8, 1.7)          | 0.58    |
|                        |         | MNP         | 1.1<br>(0.7, 1.7)           | 0.77    | 1.2<br>(0.8, 1.8)          | 0.47    |

HAI: hemagglutination inhibition; GMT: geometric mean titer; GMR: geometric mean titer ratio; CI: confidence interval; IM: intramuscular; MNP: microneedle patch;

\*Estimated geometric mean titer ratio for those in the higher severity category compared with those in the lower severity category

^Adjusted for body mass index category, sex, prior inactivated influenza vaccination, race, ethnicity, and study day

**Table S8. Reaction Severity and HAI Titer Fold Change by Study Day.**

| Reaction            | Antigen | Study Group | Day 28 FCR* (95% CI) | p-value | Day 180 FCR* (95% CI) | p-value |
|---------------------|---------|-------------|----------------------|---------|-----------------------|---------|
| Unadjusted          |         |             |                      |         |                       |         |
| Severe (Yes vs. No) | H1N1    | IM          | 0.7 (0.2, 2.0)       | 0.46    | 0.7 (0.2, 2.3)        | 0.60    |
|                     |         | MNP         | 0.5 (0.2, 1.2)       | 0.12    | 0.6 (0.3, 1.5)        | 0.28    |
|                     | H3N2    | IM          | 1.7 (0.9, 3.2)       | 0.12    | 1.5 (0.8, 2.8)        | 0.23    |
|                     |         | MNP         | 0.9 (0.5, 1.7)       | 0.80    | 1.5 (0.8, 2.7)        | 0.20    |
|                     | B       | IM          | 1.0 (0.5, 2.3)       | 0.91    | 1.1 (0.5, 2.4)        | 0.82    |
|                     |         | MNP         | 1.0 (0.5, 2.0)       | 0.96    | 1.2 (0.6, 2.3)        | 0.66    |
| Adjusted^           |         |             |                      |         |                       |         |
| Severe (Yes vs. No) | H1N1    | IM          | 0.6 (0.2, 1.9)       | 0.40    | 0.7 (0.2, 2.1)        | 0.53    |
|                     |         | MNP         | 0.6 (0.3, 1.3)       | 0.17    | 0.7 (0.3, 1.6)        | 0.41    |
|                     | H3N2    | IM          | 1.5 (0.8, 2.8)       | 0.17    | 1.4 (0.7, 2.5)        | 0.32    |
|                     |         | MNP         | 1.0 (0.6, 1.7)       | 0.99    | 1.6 (0.9, 2.7)        | 0.09    |
|                     | B       | IM          | 1.0 (0.5, 2.1)       | 0.91    | 1.1 (0.5, 2.2)        | 0.80    |
|                     |         | MNP         | 1.1 (0.6, 1.9)       | 0.87    | 1.2 (0.7, 2.3)        | 0.46    |

HAI: hemagglutination inhibition; FCR: fold change ratio; CI: confidence interval; IM: intramuscular; MNP: microneedle patch;

\*Estimated fold change ratio for those in the higher severity category compared with those in the lower severity category

^Adjusted for body mass index category, sex, prior inactivated influenza vaccination, race, ethnicity, and study day

**Table S9. Reaction Duration and Longitudinal HAI GMT.**

| Reaction                  | Antigen | Study Group | Unadjusted GMR*<br>(95% CI) | p-value | Adjusted GMR*^<br>(95% CI) | p-value |
|---------------------------|---------|-------------|-----------------------------|---------|----------------------------|---------|
| Prolonged<br>(Yes vs. No) | H1N1    | IM          | 1.0<br>(0.6, 2.0)           | 0.90    | 1.0<br>(0.5, 2.0)          | 0.94    |
|                           |         | MNP         | 1.4<br>(0.8, 2.3)           | 0.26    | 1.3<br>(0.8, 2.3)          | 0.34    |
|                           | H3N2    | IM          | 1.2<br>(0.7, 2.0)           | 0.58    | 1.1<br>(0.6, 1.9)          | 0.85    |
|                           |         | MNP         | 1.0<br>(0.6, 1.5)           | 0.89    | 1.0<br>(0.6, 1.6)          | 1.0     |
|                           | B       | IM          | 1.3<br>(0.9, 1.9)           | 0.18    | 1.0<br>(0.7, 1.5)          | 0.99    |
|                           |         | MNP         | 0.9<br>(0.6, 1.4)           | 0.77    | 1.0<br>(0.7, 1.5)          | 0.94    |

HAI: hemagglutination inhibition; GMT: geometric mean titer; GMR: geometric mean titer ratio; CI: confidence interval; IM: intramuscular; MNP: microneedle patch;

\*Estimated geometric mean titer ratio for those in the prolonged category compared with those not in the prolonged category

^Adjusted for body mass index category, sex, prior inactivated influenza vaccination, race, ethnicity, and study day



**Table S10. Reaction Duration and HAI Titer Fold Change by Study Day.**

| Reaction               | Antigen | Study Group | Day 28 FCR* (95% CI) | p-value | Day 180 FCR* (95% CI) | p-value |
|------------------------|---------|-------------|----------------------|---------|-----------------------|---------|
| Unadjusted             |         |             |                      |         |                       |         |
| Prolonged (Yes vs. No) | H1N1    | IM          | 0.7 (0.2, 2.2)       | 0.55    | 0.8 (0.3, 2.5)        | 0.72    |
|                        |         | MNP         | 0.9 (0.4, 2.0)       | 0.83    | 0.8 (0.4, 1.7)        | 0.58    |
|                        | H3N2    | IM          | 1.1 (0.6, 2.1)       | 0.72    | 1.5 (0.8, 2.9)        | 0.19    |
|                        |         | MNP         | 1.1 (0.6, 1.8)       | 0.82    | 1.4 (0.8, 2.3)        | 0.25    |
|                        | B       | IM          | 1.1 (0.5, 2.5)       | 0.72    | 1.3 (0.6, 2.8)        | 0.55    |
|                        |         | MNP         | 0.9 (0.5, 1.7)       | 0.82    | 1.0 (0.5, 1.8)        | 0.92    |
| Adjusted^              |         |             |                      |         |                       |         |
| Prolonged (Yes vs. No) | H1N1    | IM          | 0.9 (0.3, 2.8)       | 0.87    | 1.0 (0.3, 3.2)        | 0.93    |
|                        |         | MNP         | 0.7 (0.4, 1.4)       | 0.33    | 0.6 (0.3, 1.2)        | 0.18    |
|                        | H3N2    | IM          | 1.2 (0.6, 2.2)       | 0.62    | 1.6 (0.9, 3.0)        | 0.14    |
|                        |         | MNP         | 0.9 (0.5, 1.5)       | 0.66    | 1.1 (0.7, 1.9)        | 0.58    |
|                        | B       | IM          | 1.3 (0.6, 2.6)       | 0.48    | 1.4 (0.7, 2.9)        | 0.34    |
|                        |         | MNP         | 0.6 (0.4, 1.1)       | 0.08    | 0.6 (0.4, 1.1)        | 0.10    |

HAI: hemagglutination inhibition; FCR: fold change ratio; CI: confidence interval; IM: intramuscular; MNP: microneedle patch;

\*Estimated fold change ratio for those in the prolonged category compared with those not in the prolonged category

^Adjusted for body mass index category, sex, prior inactivated influenza vaccination, race, ethnicity, and study day

**Table S11. Longitudinal Associations Between Reaction Score and HAI Seroprotection.**

| Reaction Type | Antigen | Study Group | Unadjusted RR*<br>(95% CI) | p-value | Adjusted RR*^<br>(95% CI) | p-value |
|---------------|---------|-------------|----------------------------|---------|---------------------------|---------|
| Global        | H1N1    | IM          | 1.01<br>(0.90, 1.12)       | 0.88    | 0.99<br>(0.89, 1.12)      | 0.92    |
|               |         | MNP         | 1.03<br>(0.94, 1.13)       | 0.55    | 1.02<br>(0.93, 1.12)      | 0.66    |
|               | H3N2    | IM          | 0.88<br>(0.64, 1.20)       | 0.41    | 0.87<br>(0.65, 1.15)      | 0.33    |
|               |         | MNP         | 0.94<br>(0.74, 1.18)       | 0.58    | 0.93<br>(0.75, 1.14)      | 0.47    |
|               | B       | IM          | 1.02<br>(0.87, 1.19)       | 0.83    | 0.96<br>(0.81, 1.15)      | 0.67    |
|               |         | MNP         | 0.98<br>(0.80, 1.20)       | 0.83    | 1.00<br>(0.82, 1.22)      | 0.99    |
| Systemic      | H1N1    | IM          | 0.92<br>(0.79, 1.07)       | 0.28    | 0.92<br>(0.80, 1.07)      | 0.28    |
|               |         | MNP         | 1.01<br>(0.86, 1.19)       | 0.92    | 0.99<br>(0.84, 1.15)      | 0.86    |
|               | H3N2    | IM          | 0.75<br>(0.49, 1.13)       | 0.16    | 0.74<br>(0.51, 1.07)      | 0.11    |
|               |         | MNP         | 1.16<br>(0.96, 1.40)       | 0.11    | 1.13<br>(0.97, 1.33)      | 0.12    |
|               | B       | IM          | 0.99<br>(0.84, 1.18)       | 0.94    | 0.92<br>(0.78, 1.10)      | 0.37    |
|               |         | MNP         | 1.00<br>(0.69, 1.46)       | 1.0     | 0.98<br>(0.65, 1.48)      | 0.92    |
| Local         | H1N1    | IM          | 0.93<br>(0.76, 1.14)       | 0.50    | 0.91<br>(0.76, 1.09)      | 0.32    |
|               |         | MNP         | 1.08<br>(1.00, 1.18)       | 0.06    | 1.08<br>(0.98, 1.19)      | 0.10    |
|               | H3N2    | IM          | 0.63<br>(0.33, 1.21)       | 0.17    | 0.61<br>(0.35, 1.09)      | 0.10    |
|               |         | MNP         | 0.84<br>(0.66, 1.06)       | 0.15    | 0.81<br>(0.65, 1.02)      | 0.07    |
|               | B       | IM          | 0.99<br>(0.80, 1.24)       | 0.96    | 0.95<br>(0.73, 1.23)      | 0.70    |
|               |         | MNP         | 1.00<br>(0.82, 1.22)       | 1.0     | 1.02<br>(0.84, 1.25)      | 0.81    |

HAI: hemagglutination inhibition; RR: risk ratio; CI: confidence interval; IM: intramuscular; MNP: microneedle patch;

\*Estimated risk ratio for those in the higher score category compared with those in the lower score category

^Adjusted for body mass index category, sex, prior inactivated influenza vaccination, race, ethnicity, and study day

**Table S12. HAI Seroprotection\* by Vaccine Route and Day.**

| Antigen | Study Day | IM<br>(n = 25) | MNP^<br>(n = 48) | All<br>(n = 73) |
|---------|-----------|----------------|------------------|-----------------|
| H1N1    | 0         | 21 (84.0%)     | 35 (72.9%)       | 56 (76.7%)      |
|         | 28        | 25 (100.0%)    | 48 (100.0%)      | 73 (100.0%)     |
|         | 180       | 25 (100.0%)    | 48 (100.0%)      | 73 (100.0%)     |
| H3N2    | 0         | 18 (72.0%)     | 29 (60.4%)       | 47 (64.4%)      |
|         | 28        | 25 (100.0%)    | 47 (97.9%)       | 72 (98.6%)      |
|         | 180       | 20 (80.0%)     | 39 (81.25%)      | 59 (80.8%)      |
| B       | 0         | 19 (76.0%)     | 23 (47.9%)       | 42 (57.5%)      |
|         | 28        | 25 (100.0%)    | 47 (97.9%)       | 72 (98.6%)      |
|         | 180       | 23 (92.0%)     | 38 (79.2%)       | 61 (83.6%)      |

\*Number (%) of participants with hemagglutination inhibition antibody titer  $\geq 1:40$

^2 participants had missing outcome data

**Table S13A. Longitudinal Associations Between Alternative Cut Point Global Reaction Score and HAI Seroprotection.**

| Reaction Type                      | Antigen | Study Group | Unadjusted RR*<br>(95% CI) | p-value | Adjusted RR*^<br>(95% CI) | p-value |
|------------------------------------|---------|-------------|----------------------------|---------|---------------------------|---------|
| Global<br>( $\geq 3$ vs $\leq 2$ ) | H1N1    | IM          | 1.01<br>(0.91, 1.12)       | 0.79    | 0.99<br>(0.88, 1.10)      | 0.79    |
|                                    |         | MNP         | 1.05<br>(0.96, 1.16)       | 0.31    | 1.04<br>(0.94, 1.15)      | 0.47    |
|                                    | H3N2    | IM          | 0.98<br>(0.76, 1.26)       | 0.89    | 0.94<br>(0.73, 1.20)      | 0.60    |
|                                    |         | MNP         | 0.96<br>(0.79, 1.17)       | 0.70    | 0.95<br>(0.79, 1.14)      | 0.57    |
|                                    | B       | IM          | 1.09<br>(0.92, 1.30)       | 0.30    | 0.99<br>(0.83, 1.17)      | 0.87    |
|                                    |         | MNP         | 1.12<br>(0.90, 1.39)       | 0.30    | 1.15<br>(0.94, 1.41)      | 0.18    |
| Global<br>( $\geq 5$ vs $\leq 4$ ) | H1N1    | IM          | 0.98<br>(0.86, 1.13)       | 0.80    | 0.98<br>(0.85, 1.13)      | 0.77    |
|                                    |         | MNP         | 1.01<br>(0.91, 1.12)       | 0.85    | 1.01<br>(0.91, 1.12)      | 0.89    |
|                                    | H3N2    | IM          | 0.85<br>(0.56, 1.27)       | 0.42    | 0.83<br>(0.58, 1.21)      | 0.33    |
|                                    |         | MNP         | 0.97<br>(0.76, 1.22)       | 0.77    | 0.95<br>(0.77, 1.18)      | 0.66    |
|                                    | B       | IM          | 0.96<br>(0.80, 1.16)       | 0.69    | 0.90<br>(0.75, 1.09)      | 0.28    |
|                                    |         | MNP         | 1.00<br>(0.82, 1.22)       | 1.0     | 1.02<br>(0.82, 1.26)      | 0.86    |

HAI: hemagglutination inhibition; RR: risk ratio; CI: confidence interval; IM: intramuscular; MNP: microneedle patch;

\*Estimated risk ratio for those in the higher score category compared with those in the lower score category

^Adjusted for body mass index category, sex, prior inactivated influenza vaccination, race, ethnicity, and study day

**Table S13B. Longitudinal Associations Between Alternative Cut Point Systemic Reaction Score and HAI Seroprotection.**

| Reaction Type            | Antigen | Study Group | Unadjusted RR*<br>(95% CI) | p-value | Adjusted RR**^<br>(95% CI) | p-value |
|--------------------------|---------|-------------|----------------------------|---------|----------------------------|---------|
| Systemic<br>(≥ 1 vs 0)   | H1N1    | IM          | 1.02<br>(0.92, 1.14)       | 0.67    | 1.01<br>(0.90, 1.13)       | 0.91    |
|                          |         | MNP         | 1.00<br>(0.91, 1.10)       | 0.98    | 1.00<br>(0.91, 1.10)       | 0.99    |
|                          | H3N2    | IM          | 1.01<br>(0.78, 1.31)       | 0.92    | 0.97<br>(0.76, 1.24)       | 0.81    |
|                          |         | MNP         | 1.03<br>(0.84, 1.25)       | 0.81    | 1.03<br>(0.86, 1.23)       | 0.78    |
|                          | B       | IM          | 1.12<br>(0.93, 1.34)       | 0.22    | 1.02<br>(0.85, 1.21)       | 0.86    |
|                          |         | MNP         | 1.02<br>(0.83, 1.25)       | 0.86    | 1.05<br>(0.87, 1.28)       | 0.59    |
| Systemic<br>(≥ 2 vs ≤ 1) | H1N1    | IM          | 1.00<br>(0.90, 1.10)       | 0.93    | 0.98<br>(0.88, 1.08)       | 0.68    |
|                          |         | MNP         | 1.06<br>(0.97, 1.16)       | 0.20    | 1.04<br>(0.95, 1.13)       | 0.37    |
|                          | H3N2    | IM          | 0.92<br>(0.72, 1.19)       | 0.54    | 0.90<br>(0.71, 1.14)       | 0.37    |
|                          |         | MNP         | 0.99<br>(0.80, 1.24)       | 0.95    | 0.97<br>(0.79, 1.19)       | 0.77    |
|                          | B       | IM          | 1.12<br>(0.96, 1.30)       | 0.16    | 1.04<br>(0.89, 1.21)       | 0.64    |
|                          |         | MNP         | 1.08<br>(0.88, 1.34)       | 0.45    | 1.08<br>(0.88, 1.31)       | 0.47    |

HAI: hemagglutination inhibition; RR: risk ratio; CI: confidence interval; IM: intramuscular; MNP: microneedle patch;

\*Estimated risk ratio for those in the higher score category compared with those in the lower score category

^Adjusted for body mass index category, sex, prior inactivated influenza vaccination, race, ethnicity, and study day

**Table S13C. Longitudinal Associations Between Alternative Cut Point Local Reaction Score and HAI Seroprotection.**

| Reaction Type                     | Antigen | Study Group | Unadjusted RR*<br>(95% CI) | p-value | Adjusted RR*^<br>(95% CI) | p-value |
|-----------------------------------|---------|-------------|----------------------------|---------|---------------------------|---------|
| Local<br>( $\geq 1$ vs 0)         | H1N1    | IM          | 1.05<br>(0.93, 1.18)       | 0.45    | 1.03<br>(0.91, 1.17)      | 0.63    |
|                                   |         | MNP         | 1.06<br>(0.89, 1.25)       | 0.54    | 1.08<br>(0.92, 1.27)      | 0.32    |
|                                   | H3N2    | IM          | 0.94<br>(0.74, 1.20)       | 0.63    | 0.91<br>(0.71, 1.17)      | 0.47    |
|                                   |         | MNP         | 1.00<br>(0.73, 1.36)       | 0.99    | 1.00<br>(0.77, 1.29)      | 0.98    |
|                                   | B       | IM          | 0.96<br>(0.83, 1.12)       | 0.62    | 0.86<br>(0.73, 1.01)      | 0.06    |
|                                   |         | MNP         | 1.14<br>(0.76, 1.71)       | 0.53    | 1.16<br>(0.83, 1.62)      | 0.39    |
| Local<br>( $\geq 2$ vs $\leq 1$ ) | H1N1    | IM          | 0.98<br>(0.88, 1.09)       | 0.67    | 0.97<br>(0.87, 1.08)      | 0.57    |
|                                   |         | MNP         | 1.03<br>(0.93, 1.15)       | 0.53    | 1.05<br>(0.94, 1.17)      | 0.42    |
|                                   | H3N2    | IM          | 0.99<br>(0.76, 1.28)       | 0.92    | 0.96<br>(0.75, 1.23)      | 0.74    |
|                                   |         | MNP         | 0.89<br>(0.74, 1.06)       | 0.18    | 0.89<br>(0.74, 1.07)      | 0.21    |
|                                   | B       | IM          | 1.01<br>(0.87, 1.18)       | 0.87    | 0.92<br>(0.78, 1.09)      | 0.35    |
|                                   |         | MNP         | 1.13<br>(0.87, 1.47)       | 0.37    | 1.15<br>(0.88, 1.51)      | 0.31    |

HAI: hemagglutination inhibition; RR: risk ratio; CI: confidence interval; IM: intramuscular; MNP: microneedle patch;

\*Estimated risk ratio for those in the higher score category compared with those in the lower score category

^Adjusted for body mass index category, sex, prior inactivated influenza vaccination, race, ethnicity, and study day

**Table S14. Longitudinal Associations Between Reaction Score and HAI Seroconversion.**

| Reaction Type | Antigen | Study Group | Unadjusted RR*<br>(95% CI)         | p-value     | Adjusted RR*^<br>(95% CI)          | p-value         |
|---------------|---------|-------------|------------------------------------|-------------|------------------------------------|-----------------|
| Global        | H1N1    | IM          | 1.05<br>(0.59, 1.87)               | 0.86        | 1.05<br>(0.62, 1.78)               | 0.85            |
|               |         | MNP         | 0.96<br>(0.75, 1.24)               | 0.77        | 0.98<br>(0.78, 1.24)               | 0.86            |
|               | H3N2    | IM          | 1.65<br>(0.99, 2.76)               | 0.05        | 1.59<br>(0.96, 2.63)               | 0.07            |
|               |         | MNP         | 0.97<br>(0.65, 1.45)               | 0.89        | 0.97<br>(0.71, 1.33)               | 0.85            |
|               | B       | IM          | 1.29<br>(0.37, 4.41)               | 0.69        | 1.20<br>(0.43, 3.31)               | 0.73            |
|               |         | MNP         | 1.53<br>(0.96, 2.43)               | 0.07        | 1.38<br>(0.89, 2.14)               | 0.15            |
| Systemic      | H1N1    | IM          | 1.10<br>(0.59, 2.05)               | 0.76        | 1.06<br>(0.59, 1.91)               | 0.84            |
|               |         | MNP         | 0.97<br>(0.69, 1.37)               | 0.87        | 1.04<br>(0.71, 1.52)               | 0.83            |
|               | H3N2    | IM          | <b>1.69</b><br><b>(1.08, 2.65)</b> | <b>0.02</b> | 1.53<br>(0.91, 2.58)               | 0.11            |
|               |         | MNP         | 1.25<br>(0.64, 2.45)               | 0.52        | <b>1.50</b><br><b>(1.21, 1.85)</b> | <b>&lt;0.01</b> |
|               | B       | IM          | 2.26<br>(0.69, 7.39)               | 0.18        | 1.83<br>(0.70, 4.79)               | 0.22            |
|               |         | MNP         | 1.10<br>(0.53, 2.30)               | 0.80        | 1.26<br>(0.72, 2.20)               | 0.41            |
| Local         | H1N1    | IM          | 0.51<br>(0.10, 2.54)               | 0.41        | 0.52<br>(0.11, 2.53)               | 0.41            |
|               |         | MNP         | 1.02<br>(0.81, 1.29)               | 0.87        | 1.00<br>(0.79, 1.26)               | 0.99            |
|               | H3N2    | IM          | 1.54<br>(0.94, 2.55)               | 0.09        | 1.57<br>(0.88, 2.80)               | 0.13            |
|               |         | MNP         | 1.16<br>(0.82, 1.64)               | 0.40        | 1.06<br>(0.80, 1.40)               | 0.70            |
|               | B       | IM          | 1.47<br>(0.26, 8.29)               | 0.66        | 1.35<br>(0.28, 6.55)               | 0.71            |
|               |         | MNP         | 1.52<br>(0.95, 2.43)               | 0.08        | 1.14<br>(0.69, 1.90)               | 0.61            |

HAI: hemagglutination inhibition; RR: risk ratio; CI: confidence interval; IM: intramuscular; MNP: microneedle patch;

\*Estimated risk ratio for those in the higher score category compared with those in the lower score category

^Adjusted for body mass index category, sex, prior inactivated influenza vaccination, race, ethnicity, and study day

**Table S15A. Reaction Score and H1N1 HAI Seroconversion by Study Day.**

| Reaction Type | Study Group | Day 28<br>RR*<br>(95% CI) | p-value | Day 180<br>RR*<br>(95% CI) | p-value |
|---------------|-------------|---------------------------|---------|----------------------------|---------|
| Unadjusted    |             |                           |         |                            |         |
| Global        | IM          | 0.9<br>(0.5, 1.4)         | 0.56    | 1.5<br>(0.6, 3.5)          | 0.38    |
|               | MNP         | 1<br>(0.8, 1.2)           | 0.87    | 0.9<br>(0.5, 1.6)          | 0.77    |
| Systemic      | IM          | 0.8<br>(0.4, 1.4)         | 0.44    | 1.8<br>(0.8, 4.1)          | 0.15    |
|               | MNP         | 1.1<br>(1.0, 1.2)         | 0.08    | 0.8<br>(0.3, 2.2)          | 0.69    |
| Local         | IM          | 0.4<br>(0.1, 1.9)         | 0.25    | 0.7<br>(0.1, 3.9)          | 0.71    |
|               | MNP         | 1.0<br>(0.9, 1.2)         | 1.0     | 1.1<br>(0.7, 1.7)          | 0.83    |
| Adjusted^     |             |                           |         |                            |         |
| Global        | IM          | 0.9<br>(0.5, 1.4)         | 0.59    | 1.5<br>(0.7, 3.3)          | 0.33    |
|               | MNP         | 1.0<br>(0.8, 1.2)         | 0.98    | 0.9<br>(0.6, 1.5)          | 0.81    |
| Systemic      | IM          | 0.8<br>(0.4, 1.4)         | 0.41    | 1.8<br>(0.8, 3.9)          | 0.14    |
|               | MNP         | 1.1<br>(0.9, 1.4)         | 0.18    | 0.9<br>(0.3, 2.4)          | 0.78    |
| Local         | IM          | 0.4<br>(0.1, 2.0)         | 0.26    | 0.8<br>(0.2, 3.9)          | 0.75    |
|               | MNP         | 1.0<br>(0.8, 1.2)         | 0.84    | 1.0<br>(0.7, 1.6)          | 0.89    |

HAI: hemagglutination inhibition; RR: risk ratio; CI: confidence interval; IM: intramuscular; MNP: microneedle patch;

\*Estimated risk ratio for those in the higher score category compared with those in the lower score category

^Adjusted for body mass index category, sex, prior inactivated influenza vaccination, race, ethnicity, and study day



**Table S15B. Reaction Score and H3N2 HAI Seroconversion by Study Day.**

| Reaction Type | Study Group | Day 28<br>RR*<br>(95% CI)       | p-value     | Day 180<br>RR*<br>(95% CI)      | p-value         |
|---------------|-------------|---------------------------------|-------------|---------------------------------|-----------------|
| Unadjusted    |             |                                 |             |                                 |                 |
| Global        | IM          | 1.2<br>(0.8, 1.8)               | 0.42        | 7.7<br>(1.0, 62.2)              | 0.06            |
|               | MNP         | 0.9<br>(0.6, 1.3)               | 0.45        | 1.4<br>(0.5, 4.0)               | 0.54            |
| Systemic      | IM          | <b>1.5</b><br><b>(1.1, 2.0)</b> | <b>0.01</b> | 3.2<br>(0.6, 17.9)              | 0.19            |
|               | MNP         | 0.9<br>(0.5, 1.7)               | 0.84        | 2.4<br>(0.8, 7.6)               | 0.12            |
| Local         | IM          | <b>1.4</b><br><b>(1.1, 1.8)</b> | <b>0.01</b> | 2.4<br>(0.4, 16.6)              | 0.36            |
|               | MNP         | 1<br>(0.8, 1.4)                 | 0.8         | 1.7<br>(0.6, 4.6)               | 0.33            |
| Adjusted^     |             |                                 |             |                                 |                 |
| Global        | IM          | 1.1<br>(0.8, 1.7)               | 0.56        | 7.3<br>(0.9, 56.5)              | 0.06            |
|               | MNP         | 0.9<br>(0.6, 1.2)               | 0.37        | 1.4<br>(0.5, 3.6)               | 0.52            |
| Systemic      | IM          | 1.3<br>(0.9, 1.8)               | 0.11        | 2.8<br>(0.5, 16.5)              | 0.24            |
|               | MNP         | 1.1<br>(0.8, 1.6)               | 0.57        | <b>2.9</b><br><b>(1.4, 6.0)</b> | <b>&lt;0.01</b> |
| Local         | IM          | <b>1.4</b><br><b>(1.0, 1.9)</b> | <b>0.03</b> | 2.5<br>(0.3, 17.8)              | 0.37            |
|               | MNP         | 0.9<br>(0.7, 1.3)               | 0.71        | 1.5<br>(0.6, 3.8)               | 0.38            |

HAI: hemagglutination inhibition; RR: risk ratio; CI: confidence interval; IM: intramuscular; MNP: microneedle patch;

\*Estimated risk ratio for those in the higher score category compared with those in the lower score category

^Adjusted for body mass index category, sex, prior inactivated influenza vaccination, race, ethnicity, and study day

**Table S15C. Reaction Score and B HAI Seroconversion by Study Day.**

| Reaction Type | Study Group | Day 28<br>RR*<br>(95% CI) | p-value | Day 180<br>RR*<br>(95% CI) | p-value |
|---------------|-------------|---------------------------|---------|----------------------------|---------|
| Unadjusted    |             |                           |         |                            |         |
| Global        | IM          | 1.5<br>(0.5, 4.8)         | 0.45    | 0.9<br>(0.1, 6.9)          | 0.88    |
|               | MNP         | 1.3<br>(0.9, 2.0)         | 0.15    | 2.1<br>(0.9, 5.1)          | 0.11    |
| Systemic      | IM          | 1.9<br>(0.6, 5.7)         | 0.25    | 3.2<br>(0.6, 17.9)         | 0.19    |
|               | MNP         | 1.2<br>(0.6, 2.2)         | 0.60    | 0.9<br>(0.2, 5.4)          | 0.92    |
| Local         | IM          | 1.0<br>(0.2, 5.8)         | 0.96    | 2.4<br>(0.4, 16.6)         | 0.36    |
|               | MNP         | 1.3<br>(0.8, 1.9)         | 0.26    | 2.3<br>(0.9, 5.8)          | 0.07    |
| Adjusted^     |             |                           |         |                            |         |
| Global        | IM          | 1.3<br>(0.5, 3.3)         | 0.52    | 0.7<br>(0.1, 6.3)          | 0.79    |
|               | MNP         | 1.3<br>(0.8, 2.0)         | 0.32    | 2.0<br>(0.9, 4.4)          | 0.11    |
| Systemic      | IM          | 1.6<br>(0.7, 3.9)         | 0.26    | 2.7<br>(0.5, 15.1)         | 0.25    |
|               | MNP         | 1.3<br>(0.7, 2.7)         | 0.43    | 1.0<br>(0.3, 3.6)          | 0.96    |
| Local         | IM          | 1.1<br>(0.2, 5.1)         | 0.92    | 2.5<br>(0.4, 15.6)         | 0.32    |
|               | MNP         | 1.0<br>(0.6, 1.7)         | 0.96    | 1.9<br>(0.7, 4.7)          | 0.18    |

HAI: hemagglutination inhibition; RR: risk ratio; CI: confidence interval; IM: intramuscular; MNP: microneedle patch;

\*Estimated risk ratio for those in the higher score category compared with those in the lower score category

^Adjusted for body mass index category, sex, prior inactivated influenza vaccination, race, ethnicity, and study day

**Table S16A. Longitudinal Associations Between Alternative Cut Point Global Reaction Score and HAI Seroconversion.**

| Reaction Type                      | Antigen | Study Group | Unadjusted RR*<br>(95% CI)         | p-value     | Adjusted RR*^<br>(95% CI) | p-value |
|------------------------------------|---------|-------------|------------------------------------|-------------|---------------------------|---------|
| Global<br>( $\geq 3$ vs $\leq 2$ ) | H1N1    | IM          | 1.09<br>(0.67, 1.76)               | 0.73        | 1.21<br>(0.76, 1.93)      | 0.43    |
|                                    |         | MNP         | 0.84<br>(0.68, 1.04)               | 0.11        | 0.86<br>(0.69, 1.06)      | 0.16    |
|                                    | H3N2    | IM          | 1.02<br>(0.61, 1.72)               | 0.94        | 0.98<br>(0.59, 1.64)      | 0.95    |
|                                    |         | MNP         | 0.88<br>(0.62, 1.24)               | 0.46        | 0.87<br>(0.64, 1.18)      | 0.36    |
|                                    | B       | IM          | 1.57<br>(0.43, 5.69)               | 0.49        | 1.61<br>(0.53, 4.88)      | 0.40    |
|                                    |         | MNP         | 0.94<br>(0.58, 1.52)               | 0.80        | 0.84<br>(0.53, 1.32)      | 0.45    |
| Global<br>( $\geq 5$ vs $\leq 4$ ) | H1N1    | IM          | 0.96<br>(0.45, 2.05)               | 0.92        | 0.97<br>(0.47, 1.98)      | 0.93    |
|                                    |         | MNP         | 1.04<br>(0.80, 1.35)               | 0.79        | 1.02<br>(0.79, 1.31)      | 0.87    |
|                                    | H3N2    | IM          | <b>1.75</b><br><b>(1.12, 2.74)</b> | <b>0.01</b> | 1.63<br>(0.93, 2.86)      | 0.09    |
|                                    |         | MNP         | 1.08<br>(0.73, 1.60)               | 0.69        | 1.04<br>(0.77, 1.41)      | 0.78    |
|                                    | B       | IM          | 1.33<br>(0.34, 5.26)               | 0.68        | 1.21<br>(0.38, 3.81)      | 0.74    |
|                                    |         | MNP         | 1.71<br>(1.10, 2.68)               | 0.02        | 1.42<br>(0.91, 2.22)      | 0.13    |

HAI: hemagglutination inhibition; RR: risk ratio; CI: confidence interval; IM: intramuscular; MNP: microneedle patch;

\*Estimated risk ratio for those in the higher score category compared with those in the lower score category

^Adjusted for body mass index category, sex, prior inactivated influenza vaccination, race, ethnicity, and study day

**Table S16B. Longitudinal Associations Between Alternative Cut Point Systemic Reaction Score and HAI Seroconversion.**

| Reaction Type            | Antigen | Study Group | Unadjusted RR*<br>(95% CI) | p-value | Adjusted RR*^<br>(95% CI) | p-value |
|--------------------------|---------|-------------|----------------------------|---------|---------------------------|---------|
| Systemic<br>(≥ 1 vs 0)   | H1N1    | IM          | 1.06<br>(0.64, 1.73)       | 0.83    | 1.15<br>(0.71, 1.87)      | 0.57    |
|                          |         | MNP         | 0.94<br>(0.75, 1.18)       | 0.60    | 0.95<br>(0.77, 1.16)      | 0.60    |
|                          | H3N2    | IM          | 1.04<br>(0.61, 1.75)       | 0.89    | 1.02<br>(0.61, 1.71)      | 0.93    |
|                          |         | MNP         | 1.04<br>(0.73, 1.47)       | 0.83    | 1.03<br>(0.77, 1.37)      | 0.84    |
|                          | B       | IM          | 2.00<br>(0.45, 8.83)       | 0.36    | 2.16<br>(0.58, 8.05)      | 0.25    |
|                          |         | MNP         | 0.93<br>(0.57, 1.50)       | 0.76    | 0.86<br>(0.58, 1.29)      | 0.47    |
| Systemic<br>(≥ 2 vs ≤ 1) | H1N1    | IM          | 0.89<br>(0.55, 1.46)       | 0.65    | 0.95<br>(0.60, 1.50)      | 0.81    |
|                          |         | MNP         | 0.93<br>(0.71, 1.22)       | 0.60    | 1.04<br>(0.80, 1.35)      | 0.79    |
|                          | H3N2    | IM          | 0.99<br>(0.58, 1.71)       | 0.98    | 1.06<br>(0.65, 1.74)      | 0.81    |
|                          |         | MNP         | 0.87<br>(0.58, 1.32)       | 0.52    | 0.98<br>(0.71, 1.35)      | 0.90    |
|                          | B       | IM          | 1.52<br>(0.42, 5.44)       | 0.52    | 1.8<br>(0.62, 5.23)       | 0.28    |
|                          |         | MNP         | 1.01<br>(0.60, 1.70)       | 0.97    | 1.38<br>(0.87, 2.20)      | 0.17    |

HAI: hemagglutination inhibition; RR: risk ratio; CI: confidence interval; IM: intramuscular; MNP: microneedle patch;

\*Estimated risk ratio for those in the higher score category compared with those in the lower score category

^Adjusted for body mass index category, sex, prior inactivated influenza vaccination, race, ethnicity, and study day

**Table S16C. Longitudinal Associations Between Alternative Cut Point Local Reaction Score and HAI Seroconversion.**

| Reaction Type                     | Antigen | Study Group | Unadjusted RR*<br>(95% CI) | p-value | Adjusted RR*^<br>(95% CI)          | p-value         |
|-----------------------------------|---------|-------------|----------------------------|---------|------------------------------------|-----------------|
| Local<br>( $\geq 1$ vs 0)         | H1N1    | IM          | 0.75<br>(0.49, 1.14)       | 0.17    | 0.74<br>(0.50, 1.11)               | 0.15            |
|                                   |         | MNP         | 0.96<br>(0.61, 1.51)       | 0.86    | 0.87<br>(0.56, 1.34)               | 0.52            |
|                                   | H3N2    | IM          | 0.88<br>(0.53, 1.46)       | 0.63    | 1.02<br>(0.65, 1.60)               | 0.95            |
|                                   |         | MNP         | 1.02<br>(0.57, 1.83)       | 0.94    | 0.93<br>(0.61, 1.44)               | 0.76            |
|                                   | B       | IM          | 0.94<br>(0.27, 3.30)       | 0.92    | 1.01<br>(0.37, 2.77)               | 0.98            |
|                                   |         | MNP         | 0.74<br>(0.49, 1.10)       | 0.14    | <b>0.42</b><br><b>(0.24, 0.72)</b> | <b>&lt;0.01</b> |
| Local<br>( $\geq 2$ vs $\leq 1$ ) | H1N1    | IM          | 1.24<br>(0.77, 1.99)       | 0.39    | 1.28<br>(0.81, 2.03)               | 0.30            |
|                                   |         | MNP         | 1.07<br>(0.82, 1.41)       | 0.61    | 0.98<br>(0.77, 1.25)               | 0.88            |
|                                   | H3N2    | IM          | 1.64<br>(0.99, 2.71)       | 0.05    | 1.54<br>(0.97, 2.46)               | 0.07            |
|                                   |         | MNP         | 0.94<br>(0.66, 1.33)       | 0.72    | 0.87<br>(0.64, 1.17)               | 0.35            |
|                                   | B       | IM          | 2.10<br>(0.63, 7.01)       | 0.23    | 1.75<br>(0.65, 4.69)               | 0.27            |
|                                   |         | MNP         | 1.36<br>(0.83, 2.23)       | 0.22    | 0.81<br>(0.47, 1.40)               | 0.44            |

HAI: hemagglutination inhibition; RR: risk ratio; CI: confidence interval; IM: intramuscular; MNP: microneedle patch;

\*Estimated risk ratio for those in the higher score category compared with those in the lower score category

^Adjusted for body mass index category, sex, prior inactivated influenza vaccination, race, ethnicity, and study day

**Table S17A. Alternative Cut Point Global Reaction Score and HAI Seroconversion by Study Day.**

| Seroconversion by Study Day. |         |             |                       |             |                       |             |
|------------------------------|---------|-------------|-----------------------|-------------|-----------------------|-------------|
| Reaction Type                | Antigen | Study Group | Day 28 RR* (95% CI)   | p-value     | Day 180 RR* (95% CI)  | p-value     |
| Unadjusted                   |         |             |                       |             |                       |             |
| Global (≥ 3 vs ≤ 2)          | H1N1    | IM          | 1.0 (0.6, 1.4)        | 0.84        | 1.4 (0.5, 3.5)        | 0.51        |
|                              |         | MNP         | 1.0 (0.8, 1.1)        | 0.76        | 0.7 (0.4, 1.0)        | 0.08        |
|                              | H3N2    | IM          | 0.9 (0.6, 1.3)        | 0.54        | 2.4 (0.3, 19.7)       | 0.43        |
|                              |         | MNP         | 0.9 (0.7, 1.2)        | 0.38        | 0.9 (0.3, 2.4)        | 0.77        |
|                              | B       | IM          | 1.3 (0.4, 4.3)        | 0.66        | 2.4 (0.3, 19.7)       | 0.43        |
|                              |         | MNP         | 0.9 (0.6, 1.3)        | 0.50        | 1.1 (0.4, 3.0)        | 0.78        |
| Adjusted^                    |         |             |                       |             |                       |             |
| Global (≥ 3 vs ≤ 2)          | H1N1    | IM          | 1.1 (0.7, 1.7)        | 0.74        | 1.5 (0.6, 3.7)        | 0.34        |
|                              |         | MNP         | 1.0 (0.8, 1.2)        | 0.87        | 0.7 (0.4, 1.0)        | 0.07        |
|                              | H3N2    | IM          | 0.8 (0.5, 1.3)        | 0.43        | 2.3 (0.3, 18.5)       | 0.44        |
|                              |         | MNP         | 0.9 (0.6, 1.2)        | 0.37        | 0.8 (0.3, 2.2)        | 0.74        |
|                              | B       | IM          | 1.4 (0.5, 4.1)        | 0.49        | 2.6 (0.3, 21.5)       | 0.38        |
|                              |         | MNP         | 0.8 (0.5, 1.3)        | 0.33        | 1.0 (0.4, 2.5)        | 0.92        |
| Unadjusted                   |         |             |                       |             |                       |             |
| Global (≥ 5 vs ≤ 4)          | H1N1    | IM          | 0.7 (0.3, 1.5)        | 0.36        | 1.5 (0.6, 3.7)        | 0.37        |
|                              |         | MNP         | 1 (0.8, 1.2)          | 0.76        | 1.1 (0.7, 1.9)        | 0.59        |
|                              | H3N2    | IM          | <b>1.4 (1.1, 1.9)</b> | <b>0.01</b> | 4.0 (0.7, 21.8)       | 0.11        |
|                              |         | MNP         | 0.9 (0.6, 1.3)        | 0.70        | 1.7 (0.6, 4.9)        | 0.31        |
|                              | B       | IM          | 1.3 (0.4, 4.7)        | 0.66        | 1.3 (0.2, 10.3)       | 0.78        |
|                              |         | MNP         | 1.4 (1.0, 2.1)        | 0.06        | <b>2.6 (1.1, 6.2)</b> | <b>0.03</b> |
| Adjusted^                    |         |             |                       |             |                       |             |
| Global (≥ 5 vs ≤ 4)          | H1N1    | IM          | 0.7 (0.4, 1.5)        | 0.38        | 1.5 (0.7, 3.6)        | 0.31        |
|                              |         | MNP         | 1.0 (0.8, 1.2)        | 0.72        | 1.1 (0.7, 1.8)        | 0.60        |
|                              | H3N2    | IM          | 1.3 (0.9, 1.8)        | 0.11        | 3.7 (0.6, 21.2)       | 0.14        |
|                              |         | MNP         | 0.9 (0.6, 1.2)        | 0.49        | 1.6 (0.6, 4.2)        | 0.31        |
|                              | B       | IM          | 1.2 (0.4, 3.3)        | 0.72        | 1.2 (0.2, 9.3)        | 0.86        |
|                              |         | MNP         | 1.2 (0.8, 2.0)        | 0.34        | 2.2 (1.0, 5.1)        | 0.05        |

HAI: hemagglutination inhibition; RR: risk ratio; CI: confidence interval; IM: intramuscular; MNP: microneedle patch;

\*Estimated risk ratio for those in the higher score category compared with those in the lower score category

^Adjusted for body mass index category, sex, prior inactivated influenza vaccination, race, ethnicity, and study day

**Table S17B. Alternative Cut Point Systemic Reaction Score and HAI Seroconversion by Study Day.**

| Seroconversion by Study Day |         |             |                     |         |                      |         |
|-----------------------------|---------|-------------|---------------------|---------|----------------------|---------|
| Reaction Type               | Antigen | Study Group | Day 28 RR* (95% CI) | p-value | Day 180 RR* (95% CI) | p-value |
| Unadjusted                  |         |             |                     |         |                      |         |
| Systemic (≥ 1 vs 0)         | H1N1    | IM          | 1.0 (0.7, 1.5)      | 1.0     | 1.2 (0.5, 3.0)       | 0.75    |
|                             |         | MNP         | 1.0 (0.8, 1.1)      | 0.65    | 0.9 (0.6, 1.4)       | 0.67    |
|                             | H3N2    | IM          | 0.9 (0.6, 1.4)      | 0.69    | 2 (0.2, 16.6)        | 0.52    |
|                             |         | MNP         | 0.9 (0.7, 1.3)      | 0.67    | 1.5 (0.5, 4.4)       | 0.48    |
|                             | B       | IM          | 2.0 (0.5, 8.0)      | 0.33    | 2.0 (0.2, 16.6)      | 0.52    |
|                             |         | MNP         | 0.9 (0.6, 1.4)      | 0.63    | 1.0 (0.4, 2.5)       | 0.98    |
| Adjusted^                   |         |             |                     |         |                      |         |
| Systemic (≥ 1 vs 0)         | H1N1    | IM          | 1.1 (0.7, 1.7)      | 0.69    | 1.3 (0.5, 3.1)       | 0.59    |
|                             |         | MNP         | 1.0 (0.8, 1.1)      | 0.71    | 0.9 (0.6, 1.4)       | 0.66    |
|                             | H3N2    | IM          | 0.9 (0.6, 1.4)      | 0.66    | 2.0 (0.2, 16.0)      | 0.52    |
|                             |         | MNP         | 0.9 (0.7, 1.2)      | 0.63    | 1.5 (0.5, 3.9)       | 0.45    |
|                             | B       | IM          | 2.2 (0.6, 7.6)      | 0.23    | 2.2 (0.3, 17.7)      | 0.48    |
|                             |         | MNP         | 0.9 (0.6, 1.3)      | 0.44    | 0.9 (0.4, 2.1)       | 0.86    |
| Unadjusted                  |         |             |                     |         |                      |         |
| Systemic (≥ 2 vs ≤ 1)       | H1N1    | IM          | 0.9 (0.6, 1.3)      | 0.56    | 0.9 (0.4, 2.2)       | 0.82    |
|                             |         | MNP         | 1.0 (0.8, 1.2)      | 0.81    | 0.9 (0.5, 1.5)       | 0.59    |
|                             | H3N2    | IM          | 0.8 (0.5, 1.3)      | 0.31    | 3.2 (0.4, 27.2)      | 0.28    |
|                             |         | MNP         | 1.0 (0.7, 1.4)      | 0.82    | 0.6 (0.1, 2.4)       | 0.47    |
|                             | B       | IM          | 1.8 (0.5, 6.0)      | 0.33    | 1.1 (0.2, 6.5)       | 0.93    |
|                             |         | MNP         | 1.1 (0.7, 1.7)      | 0.67    | 0.8 (0.3, 2.5)       | 0.71    |
| Adjusted^                   |         |             |                     |         |                      |         |
| Systemic (≥ 2 vs ≤ 1)       | H1N1    | IM          | 0.9 (0.6, 1.4)      | 0.78    | 1.0 (0.4, 2.2)       | 0.92    |
|                             |         | MNP         | 1.1 (0.9, 1.3)      | 0.42    | 0.9 (0.5, 1.7)       | 0.86    |
|                             | H3N2    | IM          | 0.8 (0.5, 1.3)      | 0.42    | 3.5 (0.4, 27.5)      | 0.24    |
|                             |         | MNP         | 1.1 (0.8, 1.5)      | 0.63    | 0.7 (0.2, 2.4)       | 0.54    |
|                             | B       | IM          | 2.0 (0.7, 5.5)      | 0.18    | 1.2 (0.2, 6.9)       | 0.84    |
|                             |         | MNP         | 1.5 (0.9, 2.3)      | 0.12    | 1.1 (0.4, 3.0)       | 0.89    |

HAI: hemagglutination inhibition; RR: risk ratio; CI: confidence interval; IM: intramuscular; MNP: microneedle patch;

\*Estimated risk ratio for those in the higher score category compared with those in the lower score category



^Adjusted for body mass index category, sex, prior inactivated influenza vaccination, race, ethnicity, and study day

**Table S17C. Alternative Cut Point Local Reaction Score and HAI Seroconversion by Study Day.**

| Seroconversion by Study Day. |         |             |                           |                 |                      |         |
|------------------------------|---------|-------------|---------------------------|-----------------|----------------------|---------|
| Reaction Type                | Antigen | Study Group | Day 28 RR* (95% CI)       | p-value         | Day 180 RR* (95% CI) | p-value |
| Unadjusted                   |         |             |                           |                 |                      |         |
| Local<br>(≥ 1 vs 0)          | H1N1    | IM          | <b>0.7<br/>(0.5, 1.0)</b> | <b>0.03</b>     | 0.8<br>(0.3, 2.0)    | 0.67    |
|                              |         | MNP         | 1.2<br>(0.8, 1.9)         | 0.44            | 0.7<br>(0.4, 1.2)    | 0.22    |
|                              | H3N2    | IM          | 0.8<br>(0.5, 1.2)         | 0.30            | 1.4<br>(0.2, 11.5)   | 0.75    |
|                              |         | MNP         | 1.0<br>(0.6, 1.6)         | 0.96            | 1.2<br>(0.2, 7.3)    | 0.87    |
|                              | B       | IM          | 0.8<br>(0.2, 2.5)         | 0.68            | 1.4<br>(0.2, 11.5)   | 0.75    |
|                              |         | MNP         | <b>0.6<br/>(0.5, 0.8)</b> | <b>&lt;0.01</b> | 1.4<br>(0.2, 8.6)    | 0.72    |
| Adjusted^                    |         |             |                           |                 |                      |         |
| Local<br>(≥ 1 vs 0)          | H1N1    | IM          | 0.7<br>(0.5, 1.0)         | 0.06            | 0.8<br>(0.4, 1.9)    | 0.66    |
|                              |         | MNP         | 1.1<br>(0.7, 1.6)         | 0.78            | 0.6<br>(0.4, 1.1)    | 0.08    |
|                              | H3N2    | IM          | 0.9<br>(0.6, 1.4)         | 0.70            | 1.6<br>(0.2, 12.8)   | 0.64    |
|                              |         | MNP         | 0.9<br>(0.6, 1.4)         | 0.66            | 1.1<br>(0.2, 5.4)    | 0.94    |
|                              | B       | IM          | 0.9<br>(0.4, 2.3)         | 0.86            | 1.7<br>(0.2, 13.9)   | 0.64    |
|                              |         | MNP         | <b>0.4<br/>(0.2, 0.6)</b> | <b>&lt;0.01</b> | 0.8<br>(0.1, 5.8)    | 0.86    |
| Unadjusted                   |         |             |                           |                 |                      |         |
| Local<br>(≥ 2 vs ≤ 1)        | H1N1    | IM          | 1.0<br>(0.7, 1.5)         | 1.0             | 1.8<br>(0.7, 4.3)    | 0.19    |
|                              |         | MNP         | 1.1<br>(0.9, 1.4)         | 0.29            | 1.0<br>(0.6, 1.7)    | 0.97    |
|                              | H3N2    | IM          | 1.3<br>(0.9, 2.0)         | 0.15            | 4.5<br>(0.5, 37.4)   | 0.16    |
|                              |         | MNP         | 0.9<br>(0.7, 1.2)         | 0.34            | 1.2<br>(0.4, 3.9)    | 0.75    |
|                              | B       | IM          | 1.5<br>(0.5, 4.7)         | 0.48            | 4.5<br>(0.5, 37.4)   | 0.16    |
|                              |         | MNP         | 1.0<br>(0.6, 1.5)         | 0.84            | 5.5<br>(0.8, 38.2)   | 0.09    |
| Adjusted^                    |         |             |                           |                 |                      |         |
| Local<br>(≥ 2 vs ≤ 1)        | H1N1    | IM          | 1.0<br>(0.7, 1.6)         | 0.83            | 1.9<br>(0.8, 4.3)    | 0.13    |
|                              |         | MNP         | 1.0<br>(0.8, 1.2)         | 0.81            | 0.9<br>(0.6, 1.5)    | 0.75    |
|                              | H3N2    | IM          | 1.3<br>(0.9, 1.9)         | 0.24            | 4.2<br>(0.5, 33.3)   | 0.17    |
|                              |         | MNP         | 0.8<br>(0.6, 1.1)         | 0.11            | 1.1<br>(0.4, 3.4)    | 0.84    |
|                              | B       | IM          | 1.4<br>(0.6, 3.4)         | 0.45            | 4.2<br>(0.5, 35.8)   | 0.19    |
|                              |         | MNP         | 0.7<br>(0.4, 1.1)         | 0.13            | 3.8<br>(0.5, 28.1)   | 0.20    |

HAI: hemagglutination inhibition; RR: risk ratio; CI: confidence interval; IM: intramuscular; MNP: microneedle patch;

\*Estimated risk ratio for those in the higher score category compared with those in the lower score category

^Adjusted for body mass index category, sex, prior inactivated influenza vaccination, race, ethnicity, and study day

**Supplemental Figures**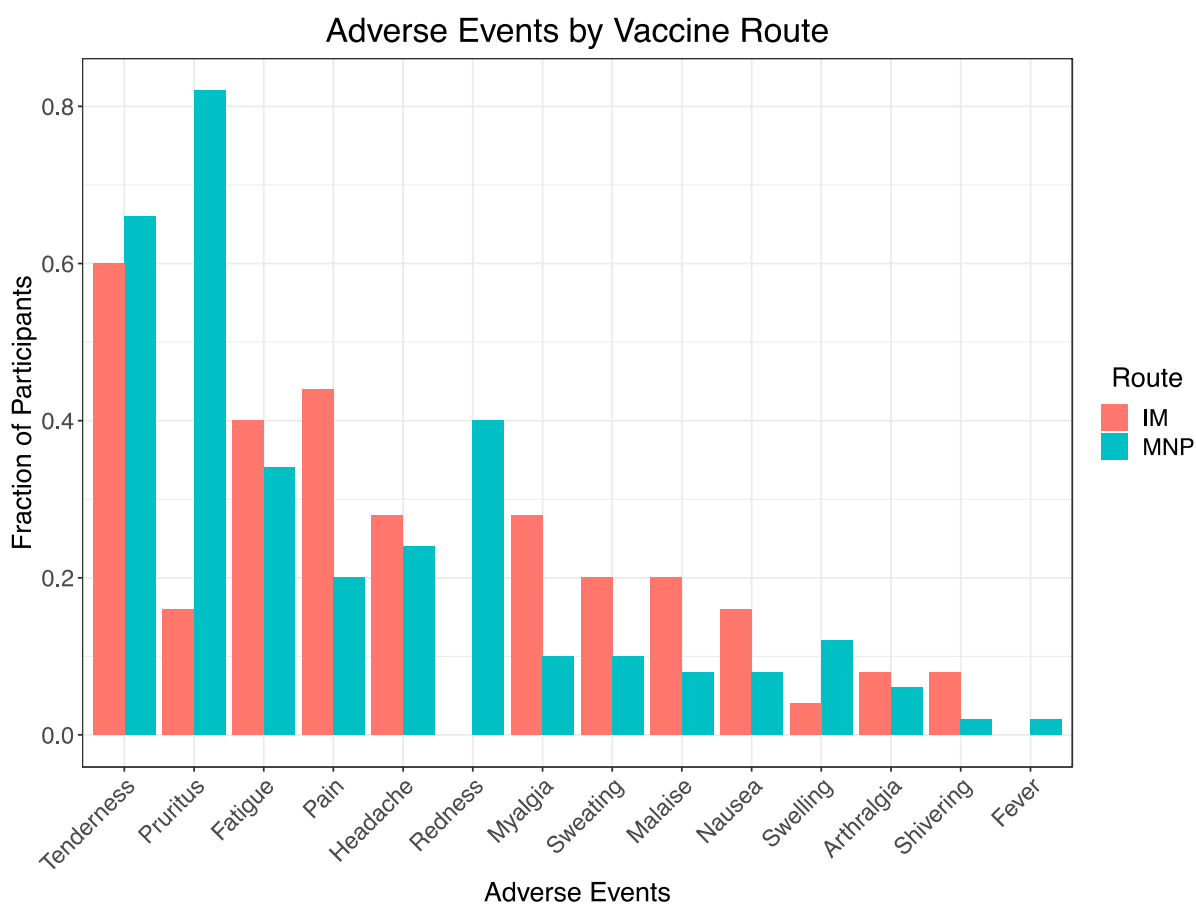

**Figure S1.** Adverse Events by Vaccine Route. Bar graph of the fraction of participants in the intramuscular (IM, red) and microneedle patch (MNP, teal) group who developed each type of adverse event. Fraction refers to the number of participants with a given adverse event in each group divided by the number of participants in the group. Adverse events are ordered on the X-axis by cumulative number of participants who reported the event.

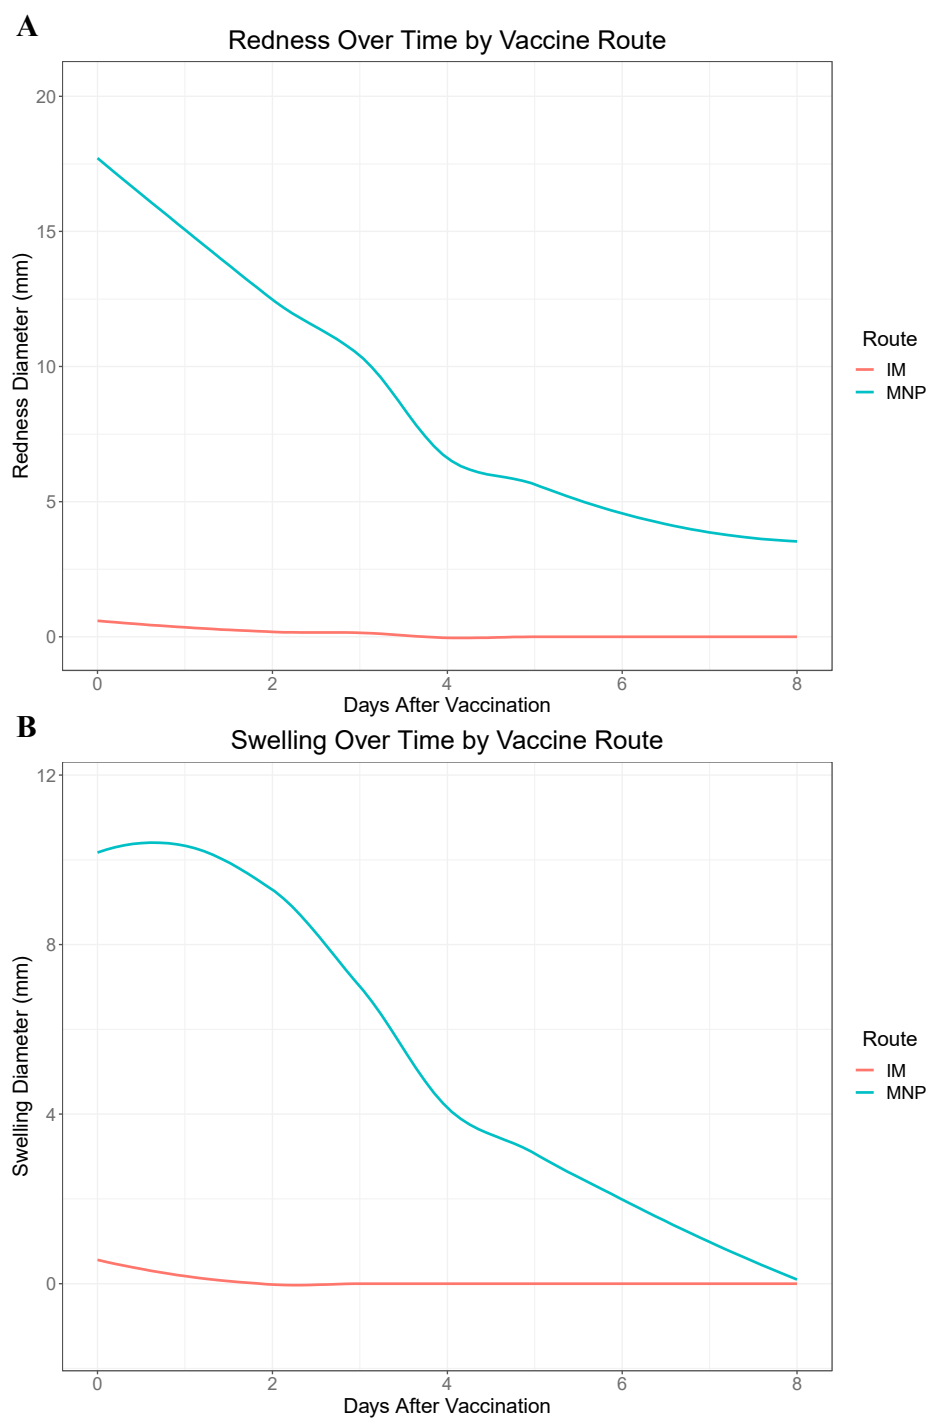

**Figure S2.** Select Local Adverse Events by Time and Vaccine Route. Smoothed conditional means graphs of redness (A) and swelling (B) diameter in millimeters over time after vaccination for those in the intramuscular (IM, red) and microneedle patch (MNP, teal) groups.

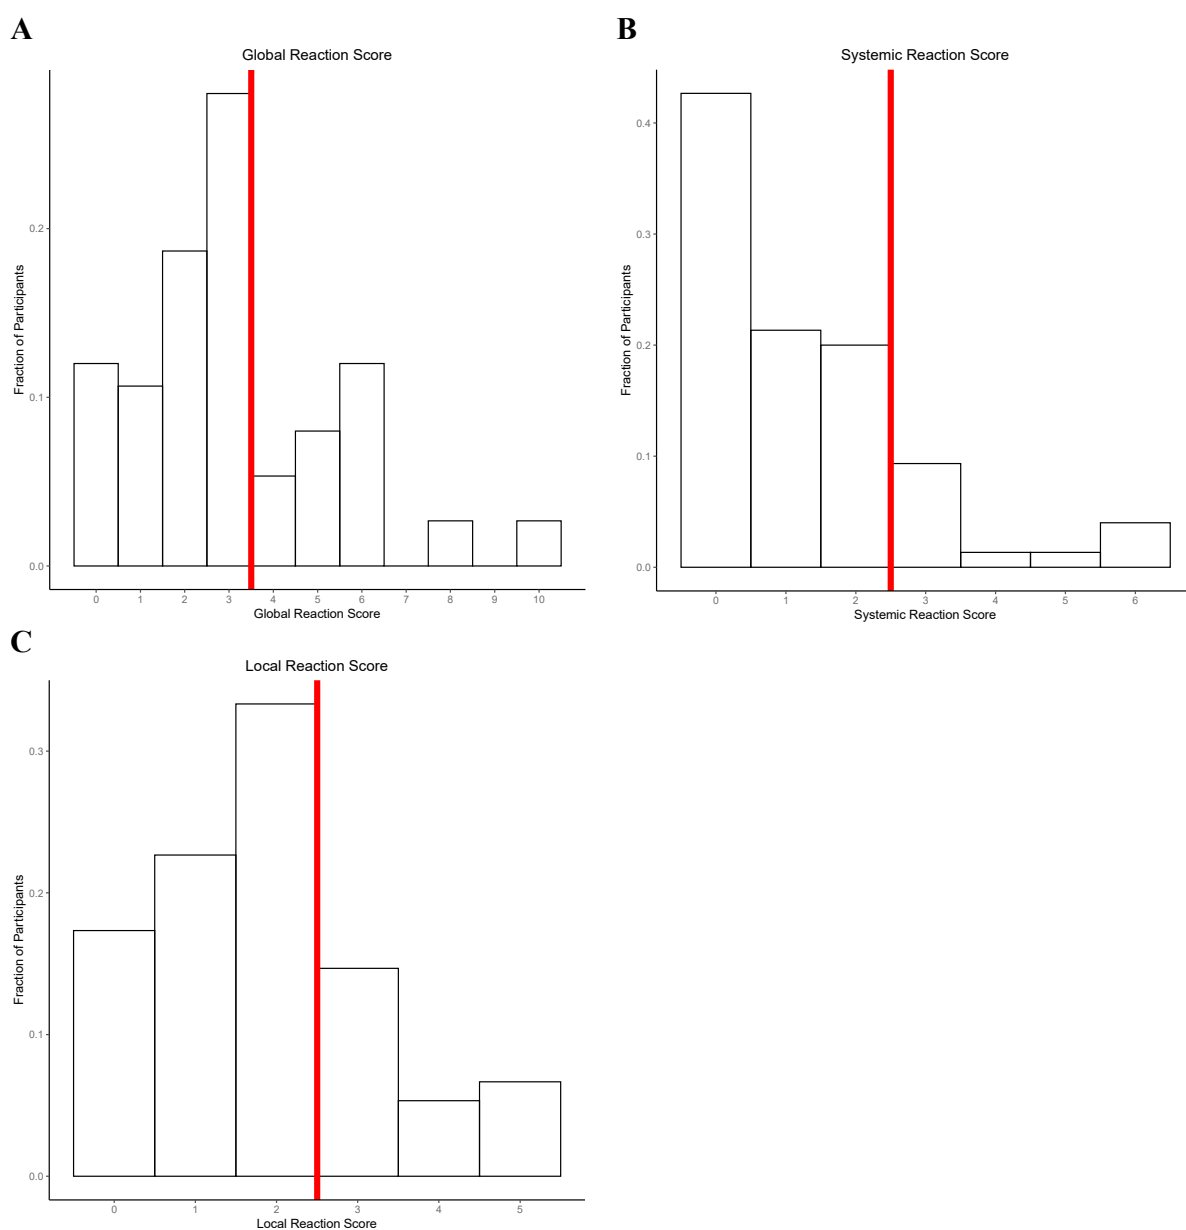

**Figure S3.** Reaction Score Univariable Distributions. Histograms of the number of participants who scored at each level of the Global (A), Systemic (B), and Local (C) reaction scores. Vertical red lines depict the dichotomization cut points chosen for the primary analyses.

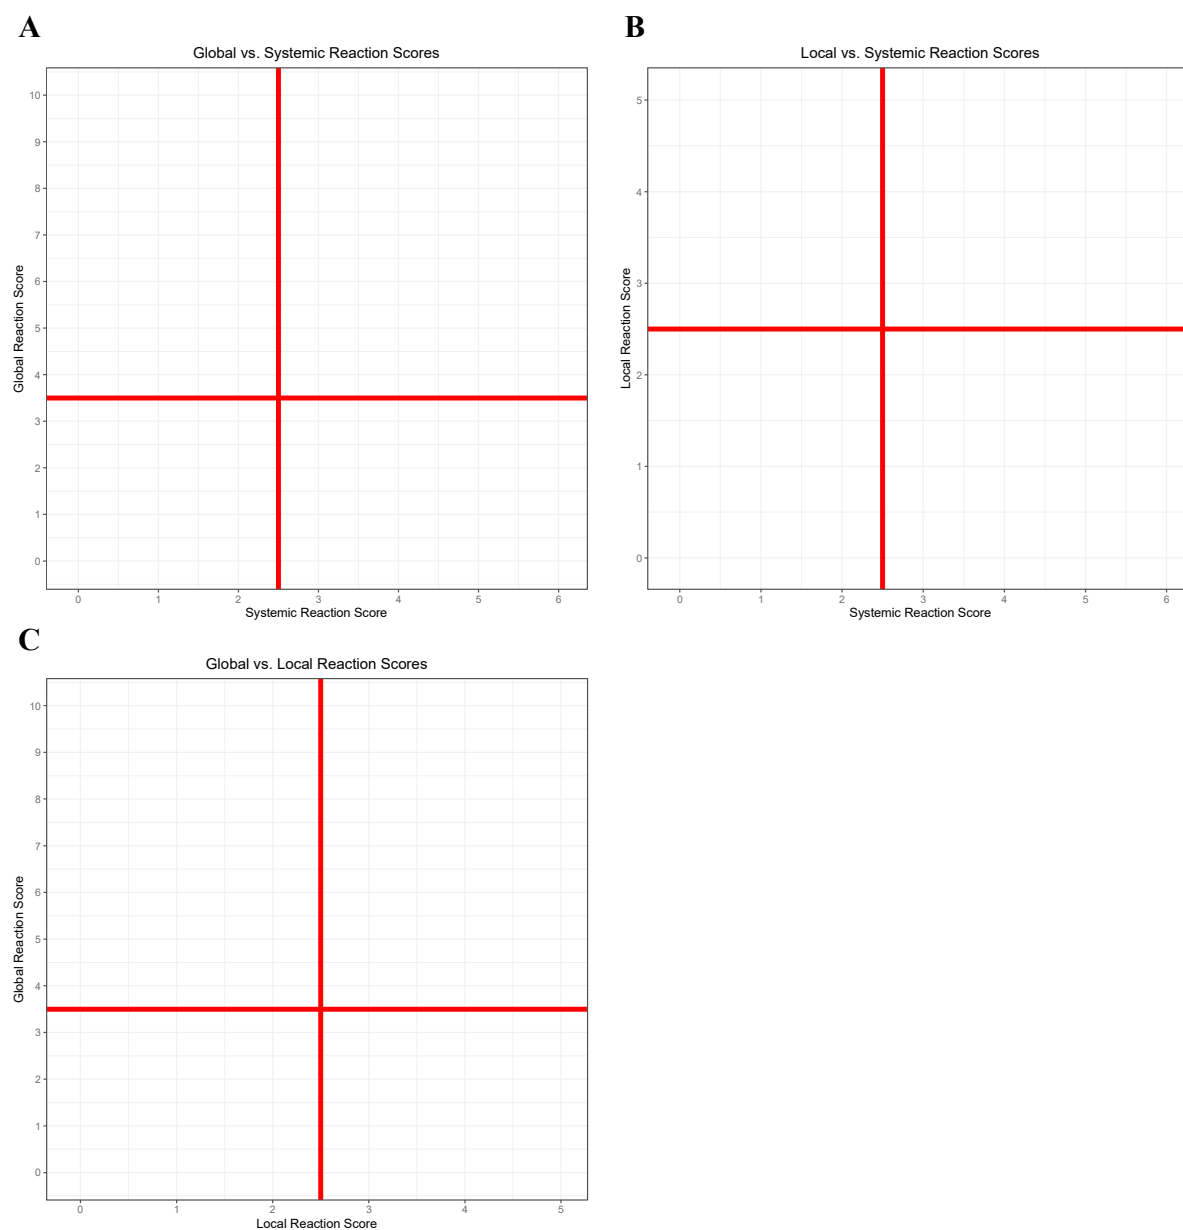

**Figure S4.** Reaction Score Bivariable Distributions. Scatterplots of the Global and Systemic (A), Local and Systemic (B), and Global and Local (C) reaction scores. Red lines depict the dichotomization cut points chosen for the primary analyses. Each point represents an individual participant.

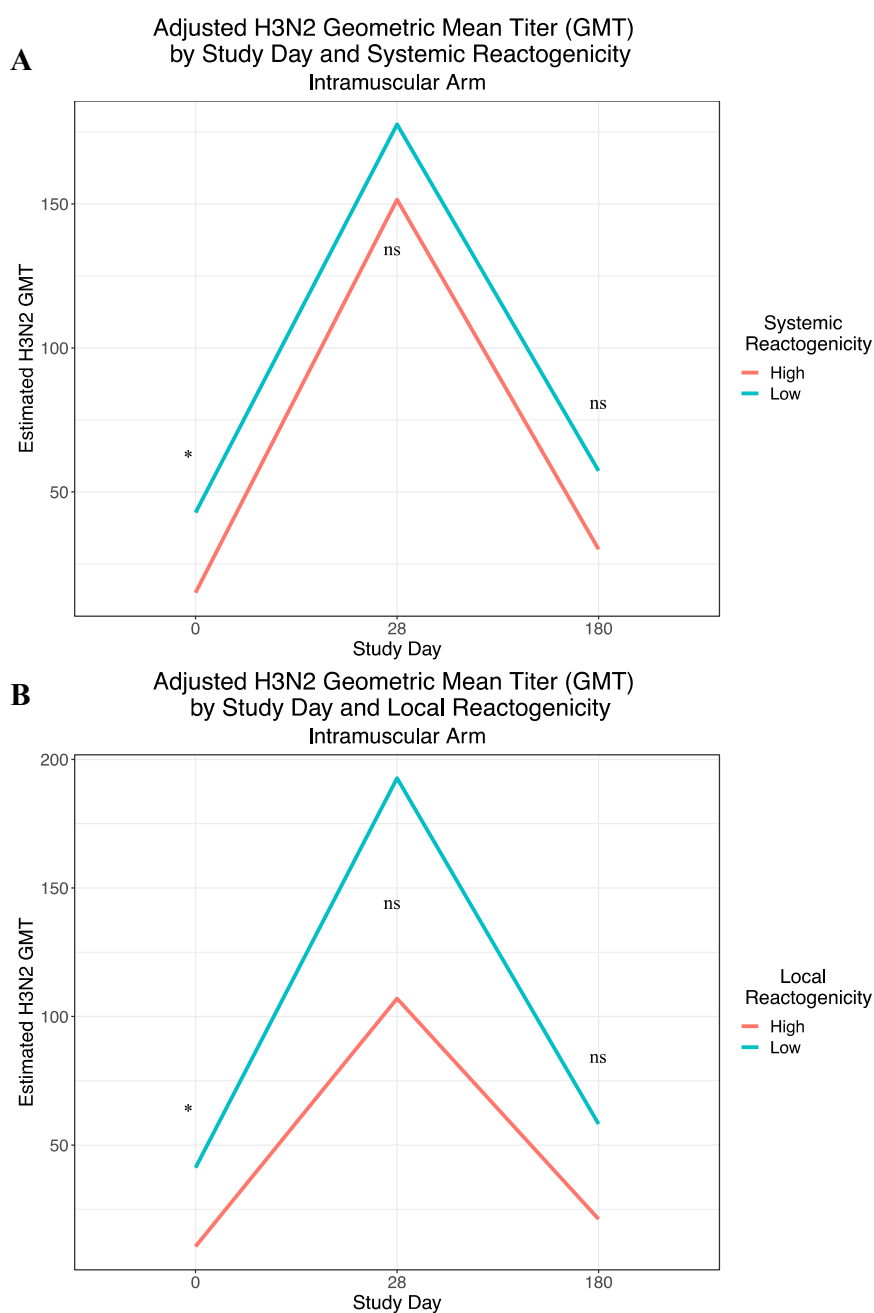

**Figure S5.** H3N2 HAI Titer by Time and Reaction Score. Estimated adjusted geometric mean titer against the H3N2 antigen of intramuscular seasonal inactivated influenza vaccine by study day, comparing low and high score levels for systemic reactogenicity (A) and local reactogenicity (B). \* denotes  $p = 0.01$  and ns denotes a comparison that is not statistically significant between the low and high score levels at the indicated time point.
